# Supplementary material for: WITHDRAWN: Differentially directional selection on grain size genes identified by RapMap during rice domestication
Source: Research Square preprint supplement (doi:10.21203/rs.3.rs-89471/v1), 2020-11-23
Supplement: Supplementary file 1 [file 3fe9a6f37dc1b5a1e80302bd.docx]

**Differentially directional selection on grain size genes identified by RapMap during rice domestication**

**Juncheng Zhang1, Dejian Zhang1, Yawei Fan1, Cuicui Li, Pengkun Xu, Wei Li, Qi Sun, Xiaodong Huang, Chunyu Zhang, Linyue Wu, Huaizhou Yang, Shiyu Wang, Xiaomin Su, Xingxing Li, Yingying Song, Meng-en Wu, Xingming Lian, Yibo Li***

National Key Laboratory of Crop Genetic Improvement and National Centre of Plant Gene Research (Wuhan), Huazhong Agricultural University, Wuhan 430070, China

1These authors contributed equally to the work.

*For correspondence: liyibo@mail.hzau.edu.cn.

**Supplementary Information: including 4 Supplementary tables and 9 Supplementary figures**

**Supplementary tables**

**Supplementary Table 1Five yield-related agronomic phenotypes of the rice mini-core collection with 541 diverse accessions all over the world and genotypes of eight genes for grain length and width identified by RapMap**

| **ID** | **Accession** | **Alleles of grain size/shape genes** | | | | | | | |  | **Agronomic traits** | | |
| --- | --- | --- | --- | --- | --- | --- | --- | --- | --- | --- | --- | --- | --- |
| ***GL1*** | ***GS2*** | ***GS3*** | ***GL7*** | ***GW5*** | ***GW5.1*** | ***GW7*** | ***GW8*** |  | **GL** | **GW** | **GS** |
| C001 | Sadu-cho | + | - | *GS3-1* | - | K | - | 3 | - |  | 6.38 | 2.49 | 2.57 |
| C002 | Dom Sufid | - | - | *gs3-3* | - | K | + | 1 | + |  | 7.44 | 2.07 | 3.59 |
| C003 | Gerdeh | - | - | *GS3-1* | - | K | + | 3 | - |  | 6.83 | 2.76 | 2.47 |
| C004 | Li-Jiang-Xin-Tuan-Hei-Gu | - | - | *GS3-2* | - | N | + | 1 | + |  | 6.10 | 2.75 | 2.22 |
| C005 | AZUCENA | - | - | *gs3-3* | + | Z | + | 2 | + |  | 8.10 | 2.51 | 3.22 |
| C006 | Shan-Huang Zhan-2-1 | + | - | *GS3-1* | - | K | + | 3 | - |  | NA | NA | NA |
| C007 | Shan-Huang Zhan-2-2 | + | - | *GS3-1* | - | K | + | 3 | - |  | NA | NA | NA |
| C008 | Swarna | + | - | *GS3-1* | - | K | - | 3 | - |  | 5.87 | 2.45 | 2.40 |
| C009 | MOROBEREKAN | + | - | *GS3-1* | - | NA | - | 3 | - |  | 5.98 | 2.61 | 2.29 |
| C010 | CYPRESS | - | - | *gs3-3* | + | K | + | 2 | + |  | NA | NA | NA |
| C011 | MILYANG 23 | + | - | *GS3-2* | - | K | - | 3 | - |  | 6.27 | 2.51 | 2.50 |
| C012 | Tainong67 | - | - | *GS3-2* | - | N | + | 2 | + |  | 5.20 | 3.17 | 1.64 |
| C013 | N 22 | + | - | *GS3-1* | - | K | - | 3 | - |  | NA | NA | NA |
| C014 | M202 | + | - | *GS3-2* | + | K | - | 2 | + |  | NA | NA | NA |
| C015 | Dular | + | - | *GS3-1* | - | K | + | 3 | + |  | NA | NA | NA |
| C016 | Laoguangtou83 | - | - | *GS3-2* | - | N | + | 1 | + |  | 5.19 | 2.97 | 1.75 |
| C017 | AnnongwangengB-1 | - | - | *GS3-2* | - | K | + | 1 | + |  | NA | NA | NA |
| C018 | AnnongwangengB-2 | - | - | *GS3-2* | - | N | + | 1 | + |  | 5.13 | 3.19 | 1.61 |
| C019 | Ajiaonante | + | - | *GS3-1* | - | Z | - | 3 | - |  | 5.86 | 2.72 | 2.15 |
| C020 | Guangluai-4-1 | + | - | *GS3-1* | - | Z | - | 3 | - |  | 5.50 | 2.93 | 1.88 |
| C021 | xiangaizao10 | + | + | *GS3-1* | - | Z | - | 3 | - |  | 5.78 | 2.73 | 2.11 |
| C022 | JinnanteB | + | - | *GS3* | - | K | - | 3 | - |  | 6.39 | 2.32 | 2.75 |
| C023 | Funingzipi | - | - | *GS3-2* | - | Z | + | 1 | + |  | NA | NA | NA |
| C024 | zhenshan97B-1 | + | + | *GS3-1* | - | Z | - | 3 | - |  | 6.11 | 2.79 | 2.19 |
| C025 | Qingsiai16B | + | - | *GS3-1* | - | Z | - | 2 | - |  | 5.76 | 2.54 | 2.27 |
| C026 | Weiguo | - | - | *GS3-2* | - | N | + | 1 | + |  | 5.43 | 3.04 | 1.78 |
| C027 | Dianrui409B | + | - | *gs3-3* | - | K | - | 3 | - |  | NA | NA | NA |
| C028 | Liaogeng287 | - | - | *GS3-2* | - | N | + | 2 | + |  | 5.46 | 2.98 | 1.83 |
| C029 | Huhui628 | - | - | *GS3* | - | NA | + | 1 | + |  | 5.49 | 3.28 | 1.67 |
| C030 | 88B-1 | + | - | *gs3-3* | - | K | - | 3 | - |  | 6.76 | 2.24 | 3.02 |
| C031 | 88B-2 | + | - | *gs3-3* | - | K | - | 3 | - |  | 7.30 | 2.30 | 3.17 |
| C032 | Longhuamaohu | - | - | *GS3-2* | - | N | + | 1 | + |  | 6.55 | 3.12 | 2.10 |
| C033 | Lucaihao | + | - | *GS3-1* | - | Z | - | 3 | - |  | 5.40 | 2.92 | 1.85 |
| C034 | Zhonglouyihao1 | - | - | *GS3-2* | - | K | + | 1 | + |  | NA | NA | NA |
| C035 | Yelicanghua | - | - | *GS3-2* | + | Z/K | + | 2 | + |  | NA | NA | NA |
| C036 | Shufeng101 | + | - | *gs3-3* | - | Z | - | 3 | - |  | 7.53 | 2.51 | 3.00 |
| C037 | Chengduai3hao | + | + | *GS3-1* | - | Z | - | 3 | - |  | 5.75 | 2.70 | 2.13 |
| C038 | Sankecui | + | - | *GS3-1* | - | K | - | 3 | - |  | 7.04 | 2.23 | 3.15 |
| C039 | Gongju73 | + | + | *GS3-1* | - | Z | - | 3 | - |  | 6.04 | 2.76 | 2.19 |
| C040 | Jiabala | + | + | *GS3-1* | - | Z | - | 3 | - |  | 5.76 | 2.72 | 2.12 |
| C041 | Taishannuo | + | + | *GS3-1* | - | Z | - | 3 | - |  | 5.78 | 2.77 | 2.09 |
| C042 | Guichao2hao | + | - | *GS3-1* | - | Z | + | 3 | - |  | 5.61 | 2.93 | 1.91 |
| C043 | Huke3hao | + | - | *GS3-1* | - | NA | - | 3 | - |  | 6.27 | 2.85 | 2.20 |
| C044 | Teqingxuanhui | + | - | *gs3-3* | - | Z | - | 3 | - |  | 7.46 | 2.49 | 2.99 |
| C045 | Huangsiguizhan | + | - | *GS3-1* | - | K | - | 3 | - |  | 6.02 | 2.09 | 2.88 |
| C046 | Xiangwanxian3hao | + | - | *gs3-3* | - | K | - | 3 | - |  | NA | NA | NA |
| C047 | Hanmadao-2 | + | - | *GS3-1* | - | Z | - | 1 | - |  | 5.78 | 2.76 | 2.09 |
| C048 | Zaoshunonghu6 | - | - | *GS3-2* | - | N | + | 1 | + |  | 5.62 | 3.04 | 1.85 |
| C049 | Jinyou1hao | + | + | *gs3-3* | - | K | - | 3 | - |  | 7.67 | 2.39 | 3.21 |
| C050 | Chengnongshuijing | + | - | *gs3-3* | - | K | - | 3 | - |  | 7.49 | 2.25 | 3.32 |
| C051 | PeiC122 | - | - | *GS3* | - | NA | - | 1 | + |  | 5.65 | 2.97 | 1.91 |
| C052 | Guihuahuang | - | - | *GS3-2* | - | NA | + | 1 | + |  | 5.75 | 3.16 | 1.82 |
| C053 | Momi | + | + | *gs3-3* | - | K | - | 3 | - |  | 7.75 | 2.40 | 3.23 |
| C054 | Xiushui115 | - | - | *GS3-2* | - | N | + | 1 | - |  | 5.65 | 3.03 | 1.86 |
| C055 | Sanbaili | + | - | *GS3-1* | - | Z | - | 2 | - |  | 6.20 | 2.75 | 2.25 |
| C056 | Jindao1hao | - | - | *GS3-2* | - | N | + | 1 | + |  | 5.79 | 3.13 | 1.85 |
| C057 | Dandongludao | - | - | *GS3-1* | - | Z/N | + | 2 | + |  | 5.52 | 3.12 | 1.77 |
| C058 | Liusha1hao | + | + | *GS3-1* | - | NA | - | 3 | - |  | 5.90 | 2.71 | 2.18 |
| C059 | Bawangbian1 | + | - | *GS3-1* | - | Z | - | 3 | - |  | 5.53 | 2.88 | 1.92 |
| C060 | Dongtingwanxian | + | + | *GS3-1* | - | K | - | 3 | - |  | 6.54 | 2.29 | 2.86 |
| C061 | Yangdao2hao | + | - | *gs3-3* | - | K | - | 3 | - |  | 7.01 | 2.40 | 2.93 |
| C062 | WH62 | + | - | *GS3-1* | - | Z | - | 2 | - |  | 6.02 | 2.87 | 2.10 |
| C063 | Geng87-304 | - | - | *GS3-2* | - | N | + | 1 | + |  | 5.52 | 3.11 | 1.77 |
| C064 | Sugeng2hao | - | - | *GS3-2* | - | N | + | 2 | + |  | 5.37 | 3.02 | 1.78 |
| C065 | Hongwan1hao | + | - | *GS3-1* | - | K | - | 2 | - |  | 6.13 | 2.60 | 2.36 |
| C066 | Liushizao | + | - | *GS3-1* | - | Z | + | 2 | - |  | 5.74 | 2.74 | 2.10 |
| C067 | Muxiqiu | - | - | *GS3-2* | - | NA | + | 1 | + |  | 5.49 | 3.12 | 1.76 |
| C068 | Taizhongxianxuan2 | + | + | *gs3-3* | - | K | - | 3 | - |  | NA | NA | NA |
| C069 | Dangyu5hao | + | - | *gs3-3* | - | K | - | 3 | - |  | NA | NA | NA |
| C070 | Youmangzaojing | - | - | *GS3-2* | - | N | + | 1 | + |  | 5.26 | 3.19 | 1.65 |
| C071 | Laohuzhong | - | - | *GS3-2* | - | N | + | 1 | + |  | 5.58 | 3.25 | 1.72 |
| C072 | Nantehao | + | - | *GS3-1* | - | Z | - | 3 | - |  | 5.98 | 2.71 | 2.21 |
| C073 | Esiniu | + | - | *GS3-1* | - | K | - | 3 | - |  | 6.20 | 2.30 | 2.70 |
| C074 | cunsanli | - | - | *gs3-3* | + | K | + | 2 | + |  | NA | NA | NA |
| C075 | Huangkezaonian | - | - | *GS3-2* | - | N | + | 1 | + |  | 5.44 | 3.13 | 1.73 |
| C076 | Benbanggu-1 | + | - | *GS3-1* | - | Z | - | 3 | - |  | 6.04 | 2.67 | 2.26 |
| C077 | Benbanggu-2 | + | - | *GS3-1* | - | Z | - | 3 | - |  | 6.02 | 2.65 | 2.27 |
| C078 | Qitoubaigu | + | - | *GS3-1* | - | Z | - | 2 | - |  | 6.05 | 2.91 | 2.08 |
| C079 | Muguanuo-1 | - | - | *GS3-2* | - | K/N | + | 2 | + |  | 5.34 | 3.02 | 1.77 |
| C080 | Hanmadao-1 | + | - | *GS3-1* | - | Z | + | 1 | - |  | 5.80 | 2.76 | 2.10 |
| C081 | Heidu4 | + | - | *GS3-1* | - | Z | - | 3 | - |  | 6.03 | 2.80 | 2.16 |
| C082 | Gaoyangdiandao | - | - | *GS3-2* | - | N | + | 1 | + |  | 6.05 | 2.93 | 2.06 |
| C083 | chikenuo | - | - | *GS3-2* | - | K | + | 1 | + |  | 6.19 | 2.60 | 2.38 |
| C084 | Haobuka | - | - | *gs3-3* | + | N | + | 2 | - |  | NA | NA | NA |
| C085 | Shanjiugu | - | - | *GS3-2* | + | N | + | 2 | + |  | 5.70 | 3.25 | 1.75 |
| C086 | Fanhaopi | + | - | *GS3* | - | K | - | 3 | - |  | 5.68 | 2.55 | 2.22 |
| C087 | Lixingeng | - | - | *GS3-2* | - | N | + | 1 | + |  | 6.32 | 3.22 | 1.96 |
| C088 | Nanganggu-2 | + | - | *GS3-1* | - | Z | + | 2 | - |  | 6.44 | 2.74 | 2.35 |
| C089 | Tieganwu | - | - | *GS3-2* | - | N | + | 1 | + |  | NA | NA | NA |
| C090 | Sanlicun | + | - | *gs3-3* | - | Z | - | 2 | - |  | 7.26 | 2.75 | 2.64 |
| C091 | Meihuanuo-1 | + | - | *GS3-1* | - | Z | + | 3 | - |  | 6.38 | 2.46 | 2.59 |
| C092 | Meihuanuo-2 | + | - | *GS3-1* | - | Z | + | 3 | - |  | 6.41 | 2.45 | 2.61 |
| C093 | Xiangnuo-2 | - | - | *GS3-2* | - | N | + | 2 | + |  | 5.66 | 2.98 | 1.90 |
| C094 | Menjiagao1 | + | + | *GS3-1* | - | Z | - | 2 | - |  | 5.71 | 2.70 | 2.11 |
| C095 | Xiaohonggu | + | - | *GS3-1* | - | Z | + | 2 | - |  | 5.82 | 2.81 | 2.07 |
| C096 | Jinxibai-1 | + | - | *GS3-1* | - | Z | - | 3 | - |  | 6.49 | 2.54 | 2.55 |
| C097 | Jinbaoyin | + | - | *GS3-1* | - | Z | - | 3 | - |  | 6.87 | 2.62 | 2.63 |
| C098 | Hongainuo | + | - | *GS3-1* | - | Z | - | 3 | - |  | 6.00 | 2.72 | 2.21 |
| C099 | WH099 | + | - | *GS3-1* | - | Z | - | 3 | - |  | 6.18 | 2.51 | 2.46 |
| C100 | WH100 | + | - | *GS3-1* | - | Z | - | 3 | - |  | 6.56 | 2.66 | 2.47 |
| C101 | Babaili | - | - | *GS3-2* | - | N | + | 1 | + |  | 4.98 | 3.13 | 1.59 |
| C102 | Qiyuexian | + | - | *GS3-1* | - | Z | - | 2 | - |  | NA | NA | NA |
| C103 | Yuyannuo-1 | - | - | *GS3-2* | - | N | + | 2 | + |  | 5.81 | 3.35 | 1.73 |
| C104 | Mamagu-1 | + | - | *GS3-1* | - | Z | - | 1 | - |  | 5.85 | 2.79 | 2.10 |
| C105 | WH105 | + | - | *gs3-3* | - | Z | - | 2 | - |  | 6.78 | 2.45 | 2.76 |
| C106 | Hongkezhenuo | - | - | *GS3-2* | - | Z | + | 1 | + |  | 5.23 | 2.87 | 1.82 |
| C107 | Mowanggunei-2 | + | - | *GS3-1* | - | Z | - | 3 | - |  | 5.90 | 2.89 | 2.04 |
| C108 | Mamagu-2 | + | - | *GS3-1* | - | Z | - | 1 | - |  | 5.92 | 2.76 | 2.14 |
| C109 | WH109 | + | - | *GS3-1* | - | Z | - | 1 | - |  | 6.00 | 2.59 | 2.31 |
| C110 | Xianggu | + | + | *GS3-1* | - | Z | - | 1 | - |  | 6.13 | 2.76 | 2.22 |
| C111 | Ximaxian | - | - | *GS3-2* | - | N | + | 2 | + |  | 5.56 | 3.00 | 1.85 |
| C112 | Jinnante43B | + | - | *GS3-1* | - | K | - | 3 | - |  | 6.38 | 2.30 | 2.78 |
| C113 | Xiangzaoxian7hao | + | - | *GS3-1* | - | K | + | 3 | - |  | 5.90 | 2.38 | 2.48 |
| C114 | 80B | + | + | *gs3-3* | - | K | - | 3 | - |  | 7.17 | 2.27 | 3.16 |
| C115 | WH115 | + | + | *gs3-3* | - | K | - | 3 | - |  | 7.45 | 2.30 | 3.25 |
| C116 | LimingB | - | - | *GS3-2* | - | N | + | 1 | + |  | NA | NA | NA |
| C117 | Jiangnongzao1hao | + | - | *gs3-3* | - | K | - | 3 | - |  | 7.28 | 2.48 | 2.93 |
| C118 | Gu154 | + | - | *gs3-3* | - | K | - | 3 | - |  | NA | NA | NA |
| C119 | Ninghui21 | - | - | *GS3-2* | - | Z | - | 1 | + |  | 5.71 | 2.98 | 1.92 |
| C120 | Shuiyuan300li | - | - | *GS3-2* | - | N | + | 2 | + |  | 5.24 | 3.09 | 1.69 |
| C121 | XiangaiB | + | - | *gs3-3* | - | Z | - | 3 | - |  | NA | NA | NA |
| C122 | Aituogu151 | + | + | *GS3-1* | - | Z | - | 3 | - |  | 5.48 | 2.89 | 1.89 |
| C123 | Taidongludao | - | - | *GS3* | + | NA | + | 2 | - |  | 6.40 | 3.21 | 1.99 |
| C124 | menjiading2 | + | - | *gs3-3* | - | Z | + | 3 | - |  | 6.66 | 2.50 | 2.67 |
| C125 | Jiefangxian | + | - | *GS3-1* | - | Z | + | 3 | - |  | 6.53 | 2.82 | 2.31 |
| C126 | Hongqi5hao | - | - | *GS3-2* | - | Z | + | 2 | - |  | 6.05 | 2.91 | 2.08 |
| C127 | Baikehualuo | + | - | *GS3-1* | - | Z | - | 3 | - |  | 6.13 | 2.58 | 2.37 |
| C128 | Liuyezhan | + | - | *GS3-1* | - | Z | + | 3 | - |  | 7.09 | 2.47 | 2.87 |
| C129 | Aihechi | + | - | *GS3* | - | NA | - | 3 | - |  | 6.49 | 2.72 | 2.39 |
| C130 | Xiangnuo-1 | - | - | *GS3-2* | - | N | + | 2 | + |  | 5.65 | 2.98 | 1.90 |
| C131 | Xuanenchangtan | + | - | *GS3-1* | - | Z | - | 1 | - |  | 5.98 | 2.62 | 2.28 |
| C132 | Jinzhinuo | + | + | *GS3-1* | - | Z | - | 2 | - |  | 6.11 | 3.04 | 2.01 |
| C133 | Muguanuo-2 | - | - | *GS3-2* | - | N | + | 2 | + |  | 5.38 | 3.12 | 1.72 |
| C134 | Wuzidui | - | - | *GS3-2* | - | N | + | 1 | + |  | NA | NA | NA |
| C135 | Xibaizhan | + | - | *GS3-2* | - | Z | - | 3 | - |  | 6.13 | 2.59 | 2.37 |
| C136 | Zegu | + | - | *GS3-1* | - | Z | + | 3 | - |  | 6.49 | 2.61 | 2.48 |
| C137 | Cungunuo | - | - | *gs3-3* | - | N | + | 2 | + |  | 7.50 | 2.96 | 2.54 |
| C138 | Lengshuigu | - | - | *GS3-2* | - | N | + | 1 | + |  | 6.45 | 3.02 | 2.13 |
| C139 | WH139 | + | - | *GS3-1* | - | N | + | 2 | - |  | 6.23 | 2.68 | 2.33 |
| C140 | Wuzuhonggu | + | + | *GS3-1* | - | Z | - | 2 | - |  | 5.84 | 2.70 | 2.16 |
| C141 | Nanganggu-1 | + | - | *GS3-1* | - | Z | + | 2 | - |  | 6.49 | 2.79 | 2.33 |
| C142 | Mowanggunei-1 | + | - | *GS3-1* | - | Z | - | 3 | - |  | 5.93 | 2.86 | 2.08 |
| C143 | Qitougu | + | + | *GS3-1* | - | Z | - | 1 | - |  | 6.56 | 2.78 | 2.35 |
| C144 | Huangpinuo | - | - | *GS3-2* | - | N | + | 2 | + |  | NA | NA | NA |
| C145 | Zhenshan97B | + | + | *GS3-1* | - | Z | - | 3 | - |  | 6.01 | 2.79 | 2.15 |
| C146 | Nipponbare | - | - | *GS3* | - | N | + | 1 | + |  | NA | NA | NA |
| C147 | Minghui63 | + | - | *gs3-3* | - | K | - | 3 | - |  | NA | NA | NA |
| C148 | 9311 | + | - | *gs3-3* | - | K | - | 3 | - |  | NA | NA | NA |
| C149 | Zhonghua11 | - | - | *GS3-2* | - | N | + | 2 | + |  | NA | NA | NA |
| C150 | Balila | - | - | *GS3-2* | - | NA | + | 1 | + |  | 5.55 | 3.14 | 1.77 |
| C151 | Nanjing11 | + | - | *GS3-1* | - | K | + | 3 | - |  | 6.20 | 2.58 | 2.41 |
| C152 | 2428 | - | - | *GS3-2* | - | Z | + | 1 | + |  | 5.03 | 3.12 | 1.61 |
| C153 | IRAT109 | - | - | *GS3-2* | + | N | + | 2 | + |  | 6.62 | 3.12 | 2.12 |
| C154 | Heigeng2hao | - | - | *GS3* | - | NA | + | 1 | + |  | 4.76 | 3.08 | 1.55 |
| C155 | Erjiunan1hao | + | - | *GS3-1* | - | Z | - | 3 | - |  | 5.64 | 2.60 | 2.17 |
| C156 | ChaoyangyihaoB | + | - | *GS3-1* | - | Z | - | 3 | - |  | 5.57 | 2.70 | 2.06 |
| C157 | L301B | + | - | *gs3-3* | - | K | - | 3 | - |  | 6.98 | 2.16 | 3.23 |
| C158 | Guangluai15 | + | - | *GS3-1* | - | Z | - | 3 | - |  | 6.05 | 2.62 | 2.31 |
| C159 | ZhuzhenB | + | - | *GS3-1* | - | Z | - | 3 | - |  | 6.39 | 2.79 | 2.29 |
| C160 | Baoxie-7B | + | - | *gs3-3* | - | K | - | 3 | - |  | 6.89 | 2.21 | 3.12 |
| C161 | Gzhenshan97B | + | - | *GS3-1* | - | Z | - | 3 | - |  | 6.34 | 2.84 | 2.24 |
| C162 | Nanxiongzaoyou | + | - | *GS3-1* | - | K | + | 3 | - |  | 6.12 | 2.61 | 2.35 |
| C163 | Zaoshuxianghei | + | - | *GS3-1* | - | K | - | 3 | - |  | 6.22 | 2.37 | 2.62 |
| C164 | IR661-1 | + | - | *GS3-1* | - | Z | - | 3 | - |  | 6.27 | 2.81 | 2.23 |
| C165 | Nanjing11-2 | + | - | *GS3* | - | NA | - | 3 | - |  | 5.94 | 2.76 | 2.15 |
| C166 | Gui630 | + | - | *GS3-1* | - | K | - | 3 | - |  | NA | NA | NA |
| C167 | 76--1 | + | - | *GS3-1* | - | Z | + | 3 | - |  | 5.64 | 2.90 | 1.95 |
| C168 | Xugunuo | + | - | *GS3-1* | - | Z | + | 3 | - |  | 5.69 | 2.88 | 1.98 |
| C169 | Taizhongzailai1 | + | + | *GS3-1* | - | K | - | 3 | - |  | 6.03 | 2.57 | 2.35 |
| C170 | Xiangwanxian1hao | + | - | *GS3-1* | - | Z | - | 3 | - |  | 5.68 | 2.73 | 2.08 |
| C171 | Xingguo | - | - | *GS3-2* | - | N | + | 1 | + |  | 5.84 | 3.01 | 1.94 |
| C172 | Zhonghua8hao | - | - | *GS3-2* | - | N | + | 2 | + |  | 5.56 | 3.01 | 1.85 |
| C173 | Aimakang | + | + | *GS3-1* | - | Z | - | 1 | - |  | 6.12 | 2.68 | 2.29 |
| C174 | JWR221 | + | - | *gs3-3* | - | K | - | 3 | - |  | 7.27 | 2.43 | 3.00 |
| C175 | Zhengxian232 | + | - | *gs3-3* | - | K | - | 3 | - |  | NA | NA | NA |
| C176 | Chenwan3hao | + | - | *GS3-1* | - | Z | - | 2 | - |  | 5.79 | 2.83 | 2.05 |
| C177 | Maguzi | - | - | *GS3-2* | - | Z | + | 1 | + |  | 5.93 | 2.72 | 2.18 |
| C178 | Aimi | + | - | *GS3-1* | - | Z | - | 2 | - |  | 6.01 | 2.61 | 2.31 |
| C179 | Haobayong1 | - | - | *GS3-2* | - | N | + | 1 | - |  | 5.58 | 3.22 | 1.73 |
| C180 | Wanlixian | + | - | *GS3-1* | - | Z | - | 3 | - |  | 6.24 | 2.61 | 2.39 |
| C181 | Feidongtangdao | - | - | *GS3-2* | - | N | + | 1 | + |  | 5.79 | 3.06 | 1.89 |
| C182 | Hengxianliangchun | + | - | *GS3-1* | - | Z | - | 3 | - |  | 6.16 | 2.97 | 2.07 |
| C183 | Leihuozhan | + | - | *GS3-1* | - | Z | + | 3 | - |  | 7.13 | 2.51 | 2.84 |
| C184 | Baikezaohe | + | - | *GS3* | - | NA | - | 1 | + |  | 6.54 | 2.70 | 2.42 |
| C185 | Haomake | - | - | *gs3-3* | + | K | + | 2 | + |  | NA | NA | NA |
| C186 | Sanbangqishiluo | - | - | *gs3-3* | + | K | + | 2 | + |  | NA | NA | NA |
| C187 | Niankenuo | - | - | *GS3-2* | - | N | + | 2 | + |  | 5.73 | 2.96 | 1.94 |
| C188 | Yangkenuo | - | - | *GS3-2* | - | N | + | 1 | + |  | 5.33 | 2.93 | 1.82 |
| C189 | Putaohuang | - | - | *GS3-2* | - | N | + | 1 | + |  | 6.07 | 3.12 | 1.94 |
| C190 | Xiangdao | + | - | *GS3-1* | - | Z | - | 1 | - |  | 6.02 | 2.53 | 2.38 |
| C191 | Younian | + | - | *GS3-1* | - | Z | - | 2 | - |  | 5.74 | 2.79 | 2.06 |
| C192 | Wukezhan | + | - | *GS3-1* | - | Z | - | 3 | - |  | 6.53 | 2.67 | 2.45 |
| C193 | Zhongnong4hao | + | - | *GS3-1* | - | Z | - | 3 | - |  | 5.63 | 2.66 | 2.12 |
| C194 | Minbeiwanxian | + | - | *GS3-1* | - | Z | - | 3 | - |  | 6.44 | 2.71 | 2.38 |
| C195 | Hongmisandan | - | - | *GS3-2* | - | N | + | 2 | + |  | NA | NA | NA |
| C196 | Yuyannuo-2 | - | - | *GS3-2* | - | N | + | 2 | + |  | 5.86 | 3.24 | 1.81 |
| C197 | Maweinian | + | - | *GS3-1* | - | Z | - | 1 | - |  | 5.77 | 2.65 | 2.18 |
| C198 | Zinuo | + | - | *gs3-3* | - | Z | - | 3 | - |  | NA | NA | NA |
| C199 | Beizinuo | + | - | *GS3-1* | - | Z | - | 0 | - |  | 6.26 | 2.66 | 2.35 |
| C200 | Biwusheng | + | - | *GS3-1* | - | Z | + | 2 | - |  | 6.30 | 2.73 | 2.31 |
| C201 | Yizhixiang | + | - | *GS3-1* | - | Z | - | 2 | - |  | 5.90 | 2.66 | 2.21 |
| C202 | Xiaobaimi | + | - | *GS3-1* | - | Z | - | 1 | - |  | 5.80 | 2.65 | 2.19 |
| C203 | Zaoxian240 | + | - | *GS3-1* | - | Z | - | 3 | - |  | 5.58 | 2.63 | 2.12 |
| W001 | Mayang Khang | + | + | *GS3-1* | - | Z | - | 1 | - |  | 5.43 | 2.83 | 1.92 |
| W002 | E B Gopher | - | - | *gs3-3* | + | K | + | 2 | + |  | 7.62 | 2.58 | 2.95 |
| W003 | C 5560 | - | - | *gs3-3* | + | K | + | 2 | - |  | NA | NA | NA |
| W004 | Quinimpol | - | - | *GS3-1* | + | N | + | 2 | + |  | 6.50 | 3.03 | 2.15 |
| W005 | TAICHU MOCHI 59 | - | - | *GS3-1* | + | K | + | 2 | - |  | NA | NA | NA |
| W006 | WC 2811 | - | - | *gs3-3* | + | K | + | 2 | + |  | NA | NA | NA |
| W007 | Criollo Chivacoa 2 | - | - | *gs3-3* | + | K | + | 2 | + |  | 7.80 | 2.44 | 3.20 |
| W008 | Secano do Brazil | - | - | *gs3-3* | + | K | + | 2 | + |  | NA | NA | NA |
| W009 | BERLIN | + | - | *gs3-3* | - | K | - | 2 | - |  | 6.87 | 2.52 | 2.73 |
| W010 | Sel. No. 388 | - | - | *GS3-2* | + | K | + | 2 | + |  | 6.44 | 2.76 | 2.34 |
| W011 | SHIMIZU MOCHI | - | - | *GS3-2* | - | N | + | 1 | + |  | 5.52 | 3.06 | 1.80 |
| W012 | KRASNODARSKIJ 424 | - | - | *GS3* | - | NA | + | 1 | + |  | 5.66 | 3.37 | 1.68 |
| W013 | Pergonil 15 | - | - | *GS3-2* | - | N | + | 1 | - |  | 5.35 | 3.37 | 1.58 |
| W014 | Red Khosha Cerma | - | - | *gs3-3* | - | K | + | 3 | - |  | NA | NA | NA |
| W015 | Safut Khosha | + | - | *GS3-2* | - | Z | + | 3 | - |  | 6.86 | 2.90 | 2.37 |
| W016 | NORIN 11 | - | - | *GS3-2* | - | N | + | 1 | + |  | 5.04 | 3.00 | 1.68 |
| W017 | R 75 | - | - | *gs3-3* | + | K | + | 2 | + |  | NA | NA | NA |
| W018 | UZ ROSZ M38 | - | - | *GS3-2* | - | K | + | 1 | + |  | 6.34 | 2.86 | 2.22 |
| W019 | H57-3-1 | - | - | *GS3-2* | + | K | + | 2 | + |  | 7.45 | 2.68 | 2.78 |
| W020 | IARI 6626 | + | - | *GS3-1* | - | Z | - | 3 | - |  | 5.23 | 2.58 | 2.02 |
| W021 | Khao Luang | - | - | *gs3-3* | + | N | + | 2 | + |  | NA | NA | NA |
| W022 | C 8429 | - | - | *gs3-3* | + | K | + | 2 | + |  | NA | NA | NA |
| W023 | Warrangal Culture 1252 | + | - | *GS3-1* | - | K | - | 3 | - |  | 6.48 | 2.64 | 2.45 |
| W024 | Padi Pohon Batu | - | - | *gs3-3* | + | K | + | 2 | - |  | 7.16 | 2.38 | 3.01 |
| W025 | NC 1/536 | + | - | *GS3-2* | - | K | + | 1 | - |  | 6.05 | 2.24 | 2.70 |
| W026 | Won Son Zo No. 11 | + | - | *GS3-1* | - | Z | + | 3 | - |  | 5.79 | 2.81 | 2.06 |
| W027 | Chacareiro Uruguay | - | - | *GS3-2* | - | K | + | 1 | + |  | 6.32 | 2.73 | 2.32 |
| W028 | Doble Carolina | + | - | *GS3-2* | - | K | + | 1 | - |  | NA | NA | NA |
| W029 | Ai Chueh Ta Pai Ku | + | - | *GS3-1* | - | Z | - | 3 | - |  | 6.09 | 2.60 | 2.34 |
| W030 | Thang 10 | + | - | *GS3-1* | - | Z | + | 3 | - |  | NA | NA | NA |
| W031 | Sipirasikkam | + | - | *GS3-1* | - | Z | - | 3 | - |  | NA | NA | NA |
| W032 | TJ | + | - | *GS3-1* | - | Z | - | 3 | - |  | NA | NA | NA |
| W033 | PD 46 | + | - | *GS3-1* | - | Z | - | 3 | - |  | 6.13 | 2.66 | 2.31 |
| W034 | PATNAI 6 | + | - | *GS3-2* | - | K | + | 2 | - |  | NA | NA | NA |
| W035 | K8C-263-3 | + | - | *GS3-1* | - | Z | - | 3 | - |  | 6.48 | 2.58 | 2.51 |
| W036 | Chun 118-33 | + | - | *GS3-1* | - | Z | - | 1 | - |  | 6.14 | 2.64 | 2.32 |
| W037 | Manga Kely 694 | + | - | *GS3-2* | - | K | + | 3 | - |  | 7.27 | 2.68 | 2.71 |
| W038 | BLUE STICK | - | - | *GS3-2* | - | NA | + | 1 | + |  | NA | NA | NA |
| W039 | Nam Dawk Mai | + | - | *GS3-1* | - | Z | - | 1 | - |  | 6.51 | 2.74 | 2.37 |
| W040 | INIAP 7 | + | + | *gs3-3* | + | K | - | 2 | - |  | NA | NA | NA |
| W041 | Onu B | - | - | *gs3-3* | + | K | + | 2 | - |  | NA | NA | NA |
| W042 | Red | + | - | *GS3-2* | - | N | - | 1 | - |  | 6.23 | 2.73 | 2.28 |
| W043 | Dichroa Alef Uslkij | + | + | *gs3-3* | - | K | - | 3 | - |  | 7.35 | 2.37 | 3.11 |
| W044 | BKN 6987-68-14 | + | + | *gs3-3* | - | Z | - | 3 | - |  | 7.34 | 2.52 | 2.91 |
| W045 | KUBANETS 508 | - | - | *GS3-2* | - | N | + | 1 | + |  | 6.42 | 3.18 | 2.02 |
| W046 | IR 9660-48-1-1-2 | + | + | *gs3-3* | - | Z | - | 3 | - |  | 6.84 | 2.64 | 2.59 |
| W047 | Jumli dhan | - | - | *GS3-2* | - | N | + | 1 | + |  | 6.48 | 2.94 | 2.20 |
| W048 | N-2703 | + | - | *GS3-1* | - | Z | + | 3 | - |  | 5.90 | 2.82 | 2.10 |
| W049 | PHUDUGEY | + | - | *GS3-2* | - | K | + | 1 | - |  | 6.66 | 2.84 | 2.34 |
| W050 | Ak Tokhum | - | - | *GS3-2* | - | NA | + | 1 | + |  | NA | NA | NA |
| W051 | RP2151-173-1-8 | + | + | *gs3-3* | - | K | - | 3 | - |  | 7.60 | 2.40 | 3.17 |
| W052 | HB-6-2 | - | - | *gs3-3* | - | N | + | 1 | + |  | 7.77 | 2.68 | 2.90 |
| W053 | GPNO 1106 | - | - | *gs3-3* | + | K | + | 2 | + |  | 7.62 | 2.81 | 2.72 |
| W054 | Toga | + | - | *GS3-1* | - | K | - | 3 | - |  | 7.01 | 2.42 | 2.89 |
| W055 | Ragasu | + | - | *GS3-1* | - | K | - | 3 | - |  | 5.93 | 2.82 | 2.10 |
| W056 | Tamanishiki | - | - | *GS3-2* | - | N | + | 2 | + |  | NA | NA | NA |
| W057 | Grassy | - | - | *gs3-3* | + | K | + | 2 | + |  | 7.26 | 2.83 | 2.57 |
| W058 | Kao Chio Lin Chou | + | - | *GS3-1* | - | Z | - | 3 | - |  | 5.61 | 2.71 | 2.07 |
| W059 | Niwahutaw Mochi | - | - | *GS3-2* | - | N | + | 1 | + |  | 5.52 | 2.92 | 1.89 |
| W060 | Somewake | - | - | *GS3-2* | - | N | + | 1 | + |  | 5.55 | 3.17 | 1.75 |
| W061 | Ardito | - | - | *gs3-3* | - | N | + | 1 | - |  | NA | NA | NA |
| W062 | NANTON NO. 131 | - | - | *gs3-3* | + | Z | + | 2 | + |  | 6.81 | 2.68 | 2.54 |
| W063 | Vary Tarva Osla | - | - | *gs3-3* | + | K | + | 2 | - |  | NA | NA | NA |
| W064 | CSORNUJ | - | - | *GS3-2* | - | N | + | 1 | + |  | 5.73 | 2.85 | 2.01 |
| W065 | R 67 | - | - | *gs3-3* | + | K | + | 2 | + |  | 7.57 | 2.41 | 3.14 |
| W066 | IR 238 | + | - | *GS3-1* | - | K | - | 3 | - |  | 6.47 | 2.10 | 3.08 |
| W067 | Mitak | - | - | *gs3-3* | + | K | + | 2 | + |  | 7.77 | 2.49 | 3.12 |
| W068 | Gazan | - | - | *GS3-2* | - | N | + | 1 | + |  | 5.67 | 2.86 | 1.98 |
| W069 | 99216 | + | - | *GS3-1* | - | K | + | 3 | - |  | NA | NA | NA |
| W070 | Shui Ya Jien | + | + | *gs3-3* | - | K | - | 3 | - |  | 6.99 | 2.01 | 3.47 |
| W071 | AKP 4 | + | - | *GS3-1* | - | Z | + | 3 | - |  | 6.08 | 2.68 | 2.27 |
| W072 | SORNAVARI | + | - | *GS3-2* | - | K | + | 3 | - |  | NA | NA | NA |
| W073 | IR 2061-214-2-3 | + | + | *gs3-3* | - | K | - | 3 | - |  | NA | NA | NA |
| W074 | TAINUNG 45 | + | - | *GS3-1* | - | Z | - | 3 | - |  | 6.40 | 2.73 | 2.35 |
| W075 | Sapundali Local | + | - | *GS3-1* | - | Z | - | 3 | - |  | 5.91 | 2.58 | 2.29 |
| W076 | Tauli | + | - | *GS3-1* | - | Z | + | 3 | - |  | 5.68 | 2.73 | 2.08 |
| W077 | 79 | - | - | *gs3-3* | - | K | + | 1 | - |  | 8.23 | 2.10 | 3.91 |
| W078 | B805D-MR-16-8-3 | + | + | *gs3-3* | - | Z | + | 3 | - |  | NA | NA | NA |
| W079 | A 152 | - | - | *gs3-3* | - | K | + | 3 | - |  | 7.34 | 2.40 | 3.06 |
| W080 | UZ ROS 59 | + | - | *GS3-1* | - | Z | - | 3 | - |  | 6.51 | 2.50 | 2.61 |
| W081 | Gasym Hany | - | - | *GS3-2* | - | K | + | 3 | + |  | 7.03 | 2.46 | 2.86 |
| W082 | Celiaj | - | - | *GS3-2* | - | N | + | 1 | + |  | 6.09 | 3.17 | 1.92 |
| W083 | CNTLR80076-44-1-1-1 | + | + | *gs3-3* | - | K | - | 3 | - |  | 7.07 | 2.34 | 3.02 |
| W084 | IR 58614-B-B-8-2 | + | + | *GS3-1* | - | Z | - | 3 | - |  | 6.14 | 2.54 | 2.41 |
| W085 | KECHENGNUO NO. 4 | + | - | *GS3-1* | - | Z | + | 3 | - |  | 5.58 | 2.89 | 1.93 |
| W086 | 4484 | + | - | *gs3-3* | - | K | - | 3 | - |  | 6.10 | 2.40 | 2.54 |
| W087 | YOU-I B | + | + | *GS3-1* | - | K | - | 3 | - |  | NA | NA | NA |
| W088 | CHUNJIANGZAO NO. 1 | - | - | *GS3* | - | K | + | 1 | + |  | 5.61 | 2.88 | 1.95 |
| W089 | Egyptian Wild Type | + | - | *GS3-1* | - | K | - | 3 | - |  | 6.36 | 2.22 | 2.87 |
| W090 | C.B. II | + | - | *GS3-1* | - | K | + | 3 | - |  | 5.97 | 2.50 | 2.39 |
| W091 | Gallawa | + | - | *GS3-2* | - | K | + | 1 | + |  | 5.26 | 2.47 | 2.13 |
| W092 | Karayal | + | - | *GS3-2* | - | K | + | 3 | - |  | 5.78 | 2.52 | 2.30 |
| W093 | Srav Prapay | + | - | *GS3-1* | - | K | - | 3 | - |  | 6.64 | 2.18 | 3.05 |
| W094 | Nang Bang Bentre | + | - | *GS3-1* | - | Z | + | 1 | - |  | 6.44 | 2.87 | 2.24 |
| W095 | DJ 24 | + | - | *GS3-1* | - | Z | + | 3 | - |  | 5.70 | 2.67 | 2.14 |
| W096 | DJ 102 | + | - | *GS3* | - | Z | + | 1 | - |  | 5.72 | 2.70 | 2.12 |
| W097 | Santhi 990 | - | - | *GS3* | - | K | + | 1 | - |  | NA | NA | NA |
| W098 | UZ ROS 7-13 | + | - | *GS3-1* | - | K | + | 3 | - |  | 5.91 | 2.42 | 2.44 |
| W099 | SL 22-620 | + | - | *GS3-2* | - | K | + | 3 | - |  | 5.85 | 2.59 | 2.26 |
| W100 | Spin Mere | + | - | *GS3-2* | - | K | + | 3 | - |  | 5.59 | 2.33 | 2.40 |
| W101 | AMANE | + | - | *GS3-1* | - | Z | + | 3 | - |  | 6.22 | 2.69 | 2.31 |
| W102 | Padi Tarab Arab | - | - | *gs3-3* | + | NA | + | 2 | + |  | 7.02 | 2.84 | 2.47 |
| W103 | P 35 | + | - | *GS3-1* | - | K | + | 3 | - |  | 6.26 | 2.69 | 2.33 |
| W104 | CAROLINO 164 | + | - | *GS3-1* | - | K | + | 1 | - |  | 5.68 | 2.55 | 2.23 |
| W105 | HKG 98 | + | - | *GS3-2* | - | K | + | 1 | - |  | 6.31 | 2.56 | 2.46 |
| W106 | Daudzai Field Mix | + | - | *GS3-2* | - | K | + | 3 | + |  | 6.04 | 2.48 | 2.44 |
| W107 | JP 5 | + | - | *GS3-2* | - | K | + | 3 | - |  | 6.58 | 2.83 | 2.32 |
| W108 | Hi Muke | + | - | *GS3-2* | - | K | + | 3 | - |  | 5.64 | 2.49 | 2.27 |
| W109 | WIR 911 | - | - | *GS3* | - | NA | + | 1 | + |  | 5.45 | 2.61 | 2.09 |
| W110 | Lua Chua Chan | - | - | *gs3-3* | - | NA | + | 2 | + |  | NA | NA | NA |
| W111 | Sereno | + | - | *gs3-3* | - | K | - | 2 | - |  | 6.94 | 2.53 | 2.74 |
| W112 | ARC 10633 | + | - | *GS3-1* | - | K | - | 3 | - |  | 5.97 | 2.61 | 2.29 |
| W113 | Simpor | - | - | *gs3-3* | + | K | + | 2 | + |  | NA | NA | NA |
| W114 | Heo Trang | + | - | *gs3-3* | - | K | - | 0 | - |  | 7.35 | 2.31 | 3.19 |
| W115 | THAVALU | + | - | *GS3-2* | - | K | + | 3 | - |  | 6.28 | 2.65 | 2.37 |
| W116 | WC 10253 | - | - | *gs3-3* | + | K | + | 0 | + |  | 7.29 | 3.09 | 2.36 |
| W117 | KRASNODARSKIJ 3352 | - | - | *GS3-2* | - | N | + | 1 | + |  | 5.57 | 3.25 | 1.71 |
| W118 | EMBRAPA 1200 | + | - | *gs3-3* | + | K | + | 2 | + |  | NA | NA | NA |
| W119 | WAB462-10-3-1 | - | - | *gs3-3* | + | K | + | 2 | + |  | 7.52 | 2.26 | 3.33 |
| W120 | Bombilla | - | - | *GS3-2* | - | N/K | + | 1 | + |  | 5.91 | 3.18 | 1.86 |
| W121 | TCHAMPA | + | - | *GS3-2* | - | Z | + | 1 | - |  | 6.28 | 2.75 | 2.28 |
| W122 | BHIM DHAN | - | - | *GS3-2* | + | K | + | 2 | + |  | 6.55 | 2.61 | 2.51 |
| W123 | WC 3532 | - | - | *gs3-3* | + | K | + | 2 | + |  | 7.08 | 2.74 | 2.58 |
| W124 | Kin Shan Zim | + | - | *GS3-1* | - | K | + | 3 | - |  | 5.77 | 2.31 | 2.50 |
| W125 | Yong Chal Byo | - | - | *GS3* | + | Z | + | 0 | - |  | 6.09 | 2.72 | 2.24 |
| W126 | Pan Ju | + | - | *GS3-1* | - | Z | - | 3 | - |  | 5.97 | 2.39 | 2.50 |
| W127 | Buphopa | - | - | *gs3-3* | + | K | + | 2 | + |  | NA | NA | NA |
| W128 | TAINO 38 | + | - | *GS3* | + | K | + | 2 | + |  | 7.04 | 2.37 | 2.98 |
| W129 | 2 | - | - | *gs3-3* | - | K | + | 3 | - |  | 7.34 | 2.14 | 3.43 |
| W130 | LUSITANO | - | - | *GS3* | - | NA | + | 1 | + |  | 6.80 | 2.92 | 2.33 |
| W131 | IARI 6621 | + | - | *GS3-1* | - | Z | - | 3 | - |  | NA | NA | NA |
| W132 | Hsin Hsing Pai Ku | + | - | *GS3-1* | - | Z | + | 3 | - |  | 5.76 | 2.38 | 2.42 |
| W133 | TD 70 | + | + | *GS3-1* | - | K | - | 3 | - |  | 6.19 | 2.41 | 2.57 |
| W134 | Dara | + | - | *GS3-1* | - | K | + | 2 | - |  | NA | NA | NA |
| W135 | Shimla Early | + | - | *GS3-1* | - | Z | - | 3 | - |  | 6.22 | 2.48 | 2.51 |
| W136 | LA PLATA GENA F.A. | - | + | *gs3-3* | - | Z | + | 3 | + |  | NA | NA | NA |
| W137 | CM1, HAIPONG | + | + | *gs3-3* | - | Z | - | 3 | - |  | 7.45 | 2.71 | 2.75 |
| W138 | 4595 | + | - | *GS3-1* | - | K | - | 1 | - |  | 6.49 | 2.25 | 2.88 |
| W139 | A 5 | - | - | *GS3-1* | - | Z | + | 0 | - |  | 5.54 | 2.83 | 1.96 |
| W140 | Ittikulama | + | - | *GS3-2* | - | K | + | 3 | - |  | 6.35 | 2.44 | 2.60 |
| W141 | DNJ 179 | + | - | *GS3-1* | - | K | - | 3 | - |  | 6.79 | 2.58 | 2.63 |
| W142 | DNJ 121 | + | - | *GS3-1* | - | Z | - | 1 | - |  | 5.63 | 2.69 | 2.10 |
| W143 | Jyanak | - | - | *GS3-2* | + | K | + | 2 | + |  | 6.06 | 2.63 | 2.30 |
| W144 | Ao Chiu 2 Hao | + | - | *GS3-1* | - | Z | - | 1 | - |  | 6.29 | 2.69 | 2.34 |
| W145 | GUYANE 1 | + | - | *GS3-2* | - | Z | - | 3 | - |  | 5.91 | 2.65 | 2.23 |
| W146 | 10340 | + | - | *GS3-2* | - | Z | + | 1 | - |  | 5.85 | 2.81 | 2.08 |
| W147 | BR11 | + | + | *gs3-3* | - | K | - | 3 | - |  | 6.94 | 2.31 | 3.00 |
| W148 | BR24 | + | - | *GS3-1* | - | Z | - | 3 | - |  | 5.93 | 2.80 | 2.12 |
| W149 | 93072 | + | - | *gs3-3* | - | Z | - | 3 | - |  | 7.54 | 2.52 | 2.99 |
| W150 | 108S | + | - | *gs3-3* | - | Z | + | 1 | - |  | NA | NA | NA |
| W151 | C418 | + | - | *gs3-3* | - | Z | - | 1 | - |  | NA | NA | NA |
| W152 | CDR22 | + | - | *gs3-3* | - | Z/K | - | 3 | - |  | 7.59 | 2.31 | 3.28 |
| W153 | Chenghui448 | + | - | *gs3-3* | - | K | - | 3 | - |  | NA | NA | NA |
| W154 | Fengaizhan | + | - | *gs3-3* | - | K | - | 3 | - |  | NA | NA | NA |
| W155 | Gang46B | + | - | *gs3-3* | - | K | - | 3 | - |  | NA | NA | NA |
| W156 | Gumei2hao | + | - | *GS3-1* | - | Z | - | 3 | - |  | 6.66 | 2.58 | 2.58 |
| W157 | Huajingxian74 | + | - | *GS3-1* | - | Z | - | 3 | - |  | NA | NA | NA |
| W158 | M3122 | + | - | *GS3-1* | - | N | - | 0 | - |  | 6.07 | 2.50 | 2.43 |
| W159 | R644 | + | - | *GS3-2* | - | K | + | 1 | - |  | NA | NA | NA |
| W160 | Shennong265 | - | - | *GS3-2* | - | N | + | 1 | + |  | 5.01 | 2.95 | 1.70 |
| W161 | Y134 | + | - | *gs3-3* | - | K | + | 3 | - |  | 6.86 | 2.44 | 2.81 |
| W162 | Yuanjing7 | - | - | *GS3-2* | - | N | + | 2 | + |  | 5.13 | 2.90 | 1.77 |
| W163 | Yuexiangzhan | + | - | *GS3-1* | - | K | - | 3 | - |  | 5.95 | 2.08 | 2.86 |
| W164 | Zaoxian14 | + | - | *gs3-3* | - | K | - | 3 | - |  | 6.82 | 2.23 | 3.06 |
| W165 | Zhong413 | + | - | *GS3-1* | - | Z | + | 3 | - |  | 5.67 | 2.50 | 2.27 |
| W166 | Zhongyouzao81 | + | - | *GS3-1* | - | Z | - | 3 | - |  | 5.78 | 2.74 | 2.11 |
| W167 | Zihui100 | + | - | *GS3-1* | - | Z | - | 3 | - |  | 6.39 | 2.40 | 2.66 |
| W168 | Bg90-2 | + | - | *gs3-3* | - | Z | - | 3 | - |  | 6.79 | 2.39 | 2.84 |
| W169 | IR72 | + | - | *gs3-3* | - | K | - | 3 | - |  | 7.04 | 2.35 | 3.00 |
| W170 | PR106 | + | - | *gs3-3* | - | K | - | 3 | - |  | 7.13 | 2.12 | 3.35 |
| W171 | TKM9 | + | - | *GS3-1* | - | Z | - | 3 | - |  | 6.00 | 2.48 | 2.42 |
| W172 | Amo13 | + | + | *gs3-3* | - | K | - | 3 | - |  | 7.74 | 2.06 | 3.76 |
| W173 | Khazar | - | - | *gs3-3* | + | K | + | 2 | + |  | NA | NA | NA |
| W174 | Gayabyeo | + | - | *GS3-1* | - | Z | - | 3 | - |  | NA | NA | NA |
| W175 | Iksan438 | + | + | *gs3-3* | - | N | + | 3 | + |  | NA | NA | NA |
| W176 | Milyang23 | + | - | *GS3-2* | - | K | - | 3 | - |  | NA | NA | NA |
| W177 | MR185 | + | - | *GS3-2* | - | K | - | 3 | - |  | NA | NA | NA |
| W178 | Manawthukha | + | - | *GS3-1* | - | K | - | 3 | - |  | 6.03 | 2.16 | 2.79 |
| W179 | Shwe Thwe Yin Hyv | + | + | *gs3-3* | - | K | - | 3 | - |  | 6.71 | 2.10 | 3.20 |
| W180 | Bg300 | + | - | *GS3-1* | - | H | + | 3 | - |  | 6.14 | 2.63 | 2.33 |
| W181 | Bg94-1 | + | - | *gs3-3* | - | K | - | 3 | - |  | 7.01 | 2.39 | 2.93 |
| W182 | CR203 | + | - | *GS3-1* | - | K | + | 3 | - |  | 6.27 | 2.52 | 2.49 |
| W183 | OM997 | + | + | *gs3-3* | - | K | + | 3 | - |  | 7.22 | 2.20 | 3.28 |
| W184 | PSB RC 28 | + | + | *gs3-3* | - | K | - | 3 | - |  | 7.07 | 2.28 | 3.10 |
| W185 | PSB RC 66 | + | - | *gs3-3* | - | K | - | 3 | - |  | NA | NA | NA |
| W186 | TEQING | + | - | *GS3-1* | - | Z | - | 3 | - |  | NA | NA | NA |
| W187 | IR68552-55-3-2 | + | - | *GS3-1* | - | Z | + | 3 | - |  | NA | NA | NA |
| W188 | IR66897B | + | + | *gs3-3* | + | K | - | 2 | - |  | 7.62 | 2.01 | 3.79 |
| W189 | IR58025B | + | - | *GS3-2* | - | K | - | 3 | - |  | NA | NA | NA |
| W190 | Dhan4 | + | - | *gs3-3* | - | Z | - | 3 | - |  | 7.15 | 2.51 | 2.85 |
| W191 | Pusa | - | - | *gs3-3* | + | K | + | 2 | - |  | 8.36 | 1.92 | 4.36 |
| W192 | ASD16 | - | - | *gs3-3* | + | K | + | 2 | - |  | 8.37 | 1.91 | 4.38 |
| W193 | Dianjing | - | - | *gs3-3* | + | Z | + | 2 | + |  | NA | NA | NA |
| W194 | F6 | + | - | *gs3-3* | - | K | - | 3 | - |  | 7.23 | 2.03 | 3.57 |
| W195 | 452 | + | - | *GS3-1* | - | K | - | 3 | - |  | NA | NA | NA |
| W196 | NAN-29-2 | - | - | *GS3-2* | + | K | + | 0 | - |  | NA | NA | NA |
| W197 | Ai-Zi-DAO | + | + | *GS3-1* | - | K | + | 3 | - |  | 6.40 | 2.16 | 2.97 |
| W198 | Babaomi | + | - | *GS3-1* | - | Z | - | 1 | - |  | 6.43 | 2.84 | 2.26 |
| W199 | Diantun502 | + | - | *gs3-3* | - | K | - | 3 | - |  | 7.77 | 2.50 | 3.11 |
| W200 | Heiheaihui | + | - | *gs3-3* | - | K | - | 3 | - |  | 7.25 | 2.12 | 3.42 |
| W201 | Jiangxisimiao | + | - | *gs3-3* | - | K | - | 3 | - |  | 7.29 | 2.13 | 3.43 |
| W202 | Laohudao | + | - | *gs3-3* | - | K | - | 3 | - |  | 7.34 | 2.14 | 3.43 |
| W203 | Linjintangdao | + | - | *gs3-3* | - | Z | - | 3 | - |  | NA | NA | NA |
| W204 | Mengguandamagu | + | - | *GS3-1* | - | Z | - | 1 | - |  | 5.96 | 2.51 | 2.37 |
| W205 | Pengshantieganzhan | + | - | *GS3-1* | - | Z | - | 1 | - |  | 6.01 | 2.55 | 2.36 |
| W206 | Wumanggaonuo | + | - | *gs3-3* | - | K | - | 3 | - |  | 7.94 | 2.56 | 3.10 |
| W207 | Yunguang8hao | - | - | *GS3-2* | - | N | + | 1 | + |  | 6.08 | 2.89 | 2.10 |
| W208 | Zhongchao123 | - | - | *GS3-2* | - | N | + | 1 | + |  | 5.91 | 3.32 | 1.78 |
| W209 | Gizal159 | - | - | *GS3-2* | - | N | + | 1 | + |  | 5.74 | 3.00 | 1.92 |
| W210 | Khao Daeng | + | - | *GS3-1* | - | Z | - | 3 | - |  | 6.17 | 2.59 | 2.38 |
| W211 | Basmati370 | + | + | *gs3-3* | - | K | + | 3 | - |  | NA | NA | NA |
| W212 | Bhavani | + | - | *GS3-1* | - | Z | - | 2 | - |  | 5.54 | 2.76 | 2.01 |
| W213 | IR50 | + | - | *gs3-3* | - | K | - | 3 | - |  | NA | NA | NA |
| W214 | Jhona349 | + | - | *GS3-2* | - | K | - | 3 | - |  | 6.91 | 2.29 | 3.01 |
| W215 | Karnal Local | + | - | *GS3-2* | - | K | - | 3 | - |  | NA | NA | NA |
| W216 | Type3 | + | - | *gs3-3* | - | K | - | 1 | - |  | 7.17 | 2.28 | 3.14 |
| W217 | IRAT352 | - | - | *GS3-1* | - | Z | - | 3 | - |  | 6.02 | 2.45 | 2.45 |
| W218 | TB154E-TB-2 | - | - | *GS3-1* | - | Z | - | 3 | - |  | 6.17 | 2.54 | 2.43 |
| W219 | Domsiah | - | - | *gs3-3* | - | NA | + | 1 | + |  | NA | NA | NA |
| W220 | Tarommolai1 | - | - | *gs3-3* | - | K | + | 1 | + |  | NA | NA | NA |
| W221 | MR77 | + | - | *gs3-3* | - | K | - | 3 | - |  | 6.94 | 2.18 | 3.19 |
| W222 | IR6 | + | + | *gs3-3* | + | K | + | 2 | - |  | 7.64 | 2.25 | 3.39 |
| W223 | At354 | + | + | *gs3-3* | - | Z | - | 3 | - |  | 6.83 | 2.66 | 2.57 |
| W224 | BG304 | + | - | *gs3-3* | - | NA | - | 3 | - |  | 6.72 | 2.09 | 3.22 |
| W225 | Lemont | + | - | *gs3-3* | + | K | + | 2 | + |  | NA | NA | NA |
| W226 | M401 | - | - | *GS3-2* | + | K | + | 2 | + |  | NA | NA | NA |
| W227 | OM1706 | + | - | *gs3-3* | - | K | + | 3 | - |  | 7.70 | 2.20 | 3.50 |
| W228 | OM1723 | + | + | *gs3-3* | - | K | + | 3 | - |  | NA | NA | NA |
| W229 | X21 | + | + | *gs3-3* | - | K | + | 3 | - |  | NA | NA | NA |
| W230 | X22 | + | + | *gs3-3* | - | K | - | 3 | - |  | 7.15 | 2.21 | 3.23 |
| W231 | X23 | + | + | *GS3-1* | - | K | - | 3 | - |  | 6.66 | 2.35 | 2.84 |
| W232 | C71 | - | - | *GS3-1* | - | K | + | 0 | - |  | 6.30 | 2.41 | 2.61 |
| W233 | C70 | + | - | *GS3-1* | - | Z | - | 3 | - |  | 6.10 | 2.39 | 2.55 |
| W234 | Q5 | + | - | *GS3-1* | - | Z | - | 3 | - |  | 6.15 | 2.40 | 2.56 |
| W235 | Suiyangnian | + | - | *GS3* | - | Z | - | 1 | - |  | 5.67 | 2.53 | 2.24 |
| W236 | Pokhreli | + | - | *gs3-3* | + | K | - | 2 | - |  | 7.35 | 2.24 | 3.28 |
| W237 | Govnd | + | + | *gs3-3* | - | K | - | 3 | - |  | 7.35 | 2.09 | 3.51 |
| W238 | UPR191-66 | + | - | *gs3-3* | - | K | - | 3 | - |  | 7.23 | 2.17 | 3.33 |
| W239 | ASD18 | + | + | *GS3* | - | K | - | 3 | - |  | 6.15 | 2.24 | 2.74 |
| W240 | TGMS29 | + | - | *gs3-3* | - | K | - | 3 | - |  | 7.45 | 2.37 | 3.15 |
| W241 | Phalguna | + | + | *GS3-1* | - | Z | - | 3 | - |  | 6.55 | 2.51 | 2.61 |
| W242 | Ajaya | + | + | *gs3-3* | - | K | - | 3 | - |  | 7.71 | 2.38 | 3.25 |
| W243 | Dodda | + | - | *gs3-3* | + | K | - | 2 | - |  | 7.48 | 2.29 | 3.27 |
| W244 | Palung 2 | + | - | *gs3-3* | + | K | - | 2 | - |  | 7.35 | 2.23 | 3.30 |
| W245 | TKM6 | + | - | *gs3-3* | - | K | - | 3 | - |  | NA | NA | NA |
| W246 | RUSTYLATE | + | - | *gs3-3* | - | Z | - | 2 | - |  | NA | NA | NA |
| W247 | Yenfangghu | + | - | *GS3-1* | - | Z | - | 3 | - |  | 6.07 | 2.53 | 2.40 |
| W248 | Heimichut | + | - | *gs3-3* | - | Z | - | 3 | - |  | 6.47 | 2.40 | 2.70 |
| W249 | Teksichut | - | - | *gs3-3* | - | Z/N | + | 1 | + |  | 7.08 | 3.05 | 2.32 |
| W250 | Eiko | - | - | *gs3-3* | - | N | + | 1 | + |  | 7.22 | 3.08 | 2.34 |
| W251 | RUBIO | - | - | *gs3-3* | - | K | + | 1 | + |  | NA | NA | NA |
| W252 | SADRI RICE 1 | - | - | *gs3-3* | - | K | + | 1 | + |  | NA | NA | NA |
| W253 | Sereendan Kuning | - | - | *gs3-3* | + | K | + | 2 | + |  | 7.66 | 2.71 | 2.83 |
| W254 | SAI-BUI-BAO | - | - | *gs3-3* | + | K | + | 2 | + |  | 7.72 | 2.63 | 2.94 |
| W255 | ZIRI | - | - | *gs3-3* | - | K | + | 0 | - |  | NA | NA | NA |
| W256 | Dacca6 | - | - | *GS3-2* | - | K | + | 3 | + |  | 6.19 | 2.34 | 2.64 |
| W257 | Latisai1 | + | - | *gs3-3* | + | K | - | 2 | + |  | 7.63 | 2.79 | 2.73 |
| W258 | Amareles | - | - | *GS3-2* | - | K | + | 3 | + |  | NA | NA | NA |
| W259 | Up15 | + | - | *gs3-3* | + | K | - | 2 | - |  | 7.46 | 2.25 | 3.31 |
| W260 | Uz-Rosz 275 | - | - | *GS3-2* | + | K | + | 2 | + |  | 6.97 | 2.63 | 2.65 |
| W261 | Ginga | - | - | *GS3-2* | - | N | + | 3 | + |  | 5.57 | 2.94 | 1.90 |
| W262 | Bintapan | + | - | *GS3-1* | - | Z | - | 3 | - |  | 5.51 | 2.78 | 1.99 |
| W263 | SADAJIRA-19-303 | + | + | *GS3-1* | - | Z | - | 3 | - |  | 6.52 | 2.36 | 2.77 |
| W264 | CHOROFA | + | + | *GS3-1* | - | Z | - | 3 | - |  | 6.10 | 2.55 | 2.39 |
| W265 | La110 | + | + | *GS3-1* | - | Z | - | 3 | - |  | 6.41 | 2.34 | 2.75 |
| W266 | Yunjiang35 | + | - | *GS3-1* | - | K | - | 3 | - |  | 4.97 | 2.07 | 2.40 |
| W267 | Yunhui72 | + | - | *gs3-3* | - | K | - | 3 | - |  | 6.76 | 2.14 | 3.15 |
| W268 | Wudadaozhong | + | - | *GS3-1* | - | Z | - | 3 | - |  | 5.64 | 2.69 | 2.10 |
| W269 | IR65600-27-1-2-2 | + | - | *gs3-3* | - | K | + | 3 | - |  | NA | NA | NA |
| W270 | Yetuozai | + | - | *GS3-1* | - | K | + | 3 | - |  | NA | NA | NA |
| W271 | P59279 | + | - | *GS3-2* | - | Z | - | 3 | - |  | 6.72 | 2.53 | 2.65 |
| W272 | Tsao wan ching | + | - | *GS3-1* | - | Z | - | 3 | - |  | 6.56 | 2.65 | 2.48 |
| W273 | Anambae ndanggalasi | - | - | *GS3-1* | + | K | + | 2 | + |  | 6.01 | 2.27 | 2.65 |
| W274 | Er chiu ching | + | + | *GS3-1* | - | Z | - | 3 | - |  | 5.65 | 2.66 | 2.13 |
| W275 | Heen GW | - | - | *GS3-5* | + | Z | + | 0 | - |  | NA | NA | NA |
| W276 | Pathma wee | + | - | *GS3-1* | - | Z | + | 3 | - |  | 6.09 | 2.60 | 2.34 |
| W277 | Lakkhi kajal | + | - | *GS3-1* | - | K | + | 1 | - |  | 6.34 | 2.73 | 2.32 |
| W278 | Moisdol | + | - | *GS3-1* | - | K | + | 1 | - |  | 6.43 | 2.51 | 2.56 |
| W279 | Jabor sail | + | - | *GS3-1* | - | K | - | 3 | - |  | 5.77 | 2.65 | 2.18 |
| W280 | Sada solay | + | - | *GS3-2* | - | K | + | 1 | + |  | 6.53 | 2.74 | 2.39 |
| W281 | Sholay | - | - | *GS3-2* | - | N | + | 1 | + |  | 6.18 | 2.55 | 2.42 |
| W282 | Ma ba you zhan | + | - | *GS3-1* | - | K | - | 3 | - |  | NA | NA | NA |
| W283 | Daegujo | - | - | *GS3* | - | NA | + | 1 | + |  | 5.38 | 3.05 | 1.77 |
| W284 | Paikasa | - | - | *GS3-1* | + | K | + | 2 | - |  | 6.22 | 1.99 | 3.13 |
| W285 | Uwi | - | - | *gs3-3* | + | K | + | 2 | + |  | 7.26 | 2.40 | 3.02 |
| W286 | Garia | + | - | *GS3-1* | - | K | - | 3 | + |  | 6.21 | 2.43 | 2.56 |
| W287 | AUS 449 | + | - | *GS3-1* | - | K | - | 1 | - |  | 5.97 | 2.46 | 2.42 |
| W288 | Dourado Precoce | - | - | *gs3-3* | + | K | + | 2 | + |  | 8.15 | 2.48 | 3.28 |
| W289 | IR 661-1-140-3-117 | + | - | *gs3-3* | - | K | - | 3 | - |  | NA | NA | NA |
| W290 | Aichi Asahi | - | - | *GS3-2* | - | N | + | 2 | + |  | 5.67 | 2.91 | 1.95 |
| W291 | IR 2071-625-1-252 | + | - | *gs3-3* | - | K | + | 3 | - |  | NA | NA | NA |
| W292 | Khoia boro | + | - | *GS3-2* | - | K | + | 3 | - |  | 5.63 | 2.43 | 2.32 |
| W293 | IR 8 | + | + | *gs3-3* | - | Z | - | 3 | - |  | 7.01 | 2.64 | 2.65 |
| W294 | LABELLE | - | - | *gs3-3* | + | K | + | 2 | + |  | NA | NA | NA |
| W295 | LEBONNET | + | + | *gs3-3* | - | K | + | 3 | - |  | 7.45 | 2.13 | 3.50 |
| W296 | AUS 371 | + | - | *GS3-1* | - | K | + | 3 | - |  | 6.04 | 2.49 | 2.42 |
| W297 | AUS 373 | + | - | *GS3-1* | - | K | + | 3 | - |  | 6.01 | 2.44 | 2.46 |
| W298 | IR 36 | + | - | *gs3-3* | - | K | + | 3 | - |  | 6.93 | 2.10 | 3.30 |
| W299 | JAYA | + | + | *GS3-1* | - | Z | - | 3 | - |  | 5.68 | 2.38 | 2.38 |
| W300 | NEW BONNET | - | - | *gs3-3* | + | K | + | 2 | + |  | NA | NA | NA |
| W301 | IR 64 | + | + | *gs3-3* | - | K | + | 3 | - |  | 7.87 | 2.16 | 3.65 |
| W302 | KUNTLAN | - | - | *GS3-1* | + | Z | + | 2 | + |  | 6.28 | 2.79 | 2.26 |
| W303 | British Honduras Creole | - | - | *gs3-3* | + | K | + | 2 | + |  | 7.39 | 2.62 | 2.82 |
| W304 | CPSLO 17 | - | - | *GS3-1* | - | K | - | 3 | - |  | NA | NA | NA |
| W305 | AKITAKOMACHI | - | - | *GS3-2* | - | N | + | 1 | + |  | 5.61 | 2.84 | 1.98 |
| W306 | BASMATI 385 | + | - | *gs3-3* | - | K | + | 3 | + |  | 7.27 | 1.88 | 3.86 |
| W307 | AGNO | + | + | *gs3-3* | - | K | - | 3 | - |  | 6.96 | 2.07 | 3.36 |
| W308 | PSBRC82 | + | + | *gs3-3* | - | K | + | 3 | - |  | NA | NA | NA |
| W309 | NSICRC122 | + | + | *gs3-3* | - | Z | + | 3 | - |  | 7.76 | 2.15 | 3.60 |
| W310 | BRRI DHAN 29 | + | - | *gs3-3* | - | K | - | 3 | - |  | 6.74 | 2.15 | 3.13 |
| W311 | PR 116 | + | - | *gs3-3* | - | K | - | 3 | - |  | 7.31 | 2.30 | 3.18 |
| W312 | CIGEULIS | + | + | *GS3-2* | - | K | - | 3 | - |  | 7.17 | 2.29 | 3.14 |
| W313 | OM 2517 | + | + | *gs3-3* | - | K | + | 3 | - |  | 7.32 | 2.06 | 3.56 |
| W314 | BRRI DHAN 28 | + | - | *gs3-3* | - | K | - | 3 | - |  | 6.83 | 1.99 | 3.43 |
| W315 | CIBOGO | + | + | *gs3-3* | - | NA | - | 3 | - |  | NA | NA | NA |
| W316 | NEDA | + | - | *gs3-3* | + | K | - | 2 | - |  | 8.20 | 2.06 | 3.98 |
| W317 | CIHERANG | + | + | *gs3-3* | - | K | - | 3 | - |  | NA | NA | NA |
| W318 | Qiuqianbai | + | - | *GS3-1* | - | Z | + | 0 | - |  | NA | NA | NA |
| W319 | Guangkexiangnuo | - | - | *gs3-3* | - | N | + | 2 | + |  | NA | NA | NA |
| W320 | Wenxiangnuo | + | - | *GS3-1* | - | Z | - | 2 | - |  | 5.94 | 2.99 | 1.99 |
| W321 | Laozaogu | + | - | *GS3-1* | - | Z | - | 3 | - |  | 5.29 | 2.70 | 1.96 |
| W322 | Lengshuinuo | + | + | *GS3-1* | - | K | - | 0 | - |  | NA | NA | NA |
| W323 | Feienuo2 | - | - | *gs3-3* | + | N | + | 2 | + |  | 6.47 | 2.90 | 2.24 |
| W324 | Zimangfeie | - | - | *gs3-3* | + | N | + | 2 | + |  | 6.52 | 3.10 | 2.10 |
| W325 | Guantuibaihe | - | - | *gs3-3* | - | N | + | 2 | + |  | NA | NA | NA |
| W326 | Haolvguangnian | - | - | *gs3-3* | + | N | + | 2 | + |  | NA | NA | NA |
| W327 | JinghuB | - | - | *GS3-2* | - | N | + | 1 | + |  | 5.29 | 3.13 | 1.69 |
| W328 | Sibeitichao6 | + | - | *GS3-2* | - | N | + | 3 | + |  | NA | NA | NA |
| W329 | GPNO 5055 | + | - | *GS3-2* | + | Z | - | 2 | + |  | 6.34 | 2.78 | 2.28 |
| W330 | ASWINA 330 | + | - | *GS3-1* | - | K | + | 3 | - |  | 6.02 | 2.59 | 2.32 |
| 534 | Zhimali | - | - | *GS3-5* | - | N | + | 2 | - |  | 3.97 | 2.52 | 1.57 |
| 535 | SYB5 | - | - | *GS3-6* | - | Z | - | 3 | - |  | 4.33 | 2.40 | 1.81 |
| 536 | Chuan 7 | - | - | *GS3-4* | - | K | + | 1 | - |  | 4.38 | 2.21 | 1.98 |
| 537 | Peiai 64S | - | - | *gs3-3* | - | K | + | 1 | - |  | 6.87 | 2.19 | 3.13 |
| 538 | Chenghui 3203 | - | - | *gs3-3* | - | K | - | 3 | - |  | 8.16 | 2.33 | 3.50 |
| 539 | WZ1 | - | - | *gs3-3* | - | K | - | 3 | - |  | 8.62 | 2.51 | 3.44 |
| 540 | Chuan 106B | - | - | *gs3-3* | + | K | - | 2 | - |  | 8.86 | 1.66 | 5.33 |
| 541 | SYB4 | - | + | *gs3-3* | - | K | - | 3 | - |  | 10.27 | 2.20 | 4.67 |

For alleles of *GL1*, *GS2*, *GL7*, *GW5.1* and *GW8*, “+” and “-” represent positive and negative effects of the allele on target traits, while “NA” is not available. For *GS3*, the functional alleles are *GS3-1*, *GS3-2*, *GS3-4*, *GS3-5* and *GS3-6*, and the non-functional allele is *gs3-3* or *gs3*. For *GW5*, “K”, “Z” and “N” indicate the Kasalash, Zhenshan97 and Nipponbare type alleles of *GW5*, respectively. For *GW7*, the “1”, “2” and “3” represent the genotypes with no deletion, the 11-bp deletion and the 18-bp deletion, respectively. GL, grain length of brown rice; GW, grain width of brown rice; GS, grain shape of brown rice.

**Supplementary Table 2 Primer sets used for QTL confirmation, fine mapping and functional analyses**

| **Genes or Loci** | **Primer Name** | **Forward primer (5'–3')** | **Reverse primer (5'–3')** | **Functions** |
| --- | --- | --- | --- | --- |
| *GL1* | CH1Z7 (31.048Mb) | CGTTCATTTCGTACTTTGGTC | CTGCTCACAACTCAAGTGAC | Mapping |
| *GL1* | CH1Z6 (35.194Mb) | AAAATTGGGAACTAAGGCCTG | TTTCTCCCTGCAACTGTGCA | Mapping |
| *GL1* | CH1Z1 (37.001Mb) | GGCGGATACATGTGTTGGT | TGCTTCTCCTAGTCACGCA | Mapping |
| *GL1* | CH1Z8 (37.023Mb) | GCATGTTATCAACAGCTGGC | GATGCAACAGCTGAATTTCC | Mapping |
| *GL1* | CH1Z9 (37.093Mb) | GCAGAGCTTGGACAGGAAAC | TCATGACAAATTGGCTCGTTG | Mapping |
| *GL1* | CH1Z10 (37.112Mb) | TGACTGGTTCAGCTAATGGC | AAGATCGAGCCTGTTCCACG | Mapping |
| *GL1* | CH1Z11 (37.139Mb) | TCTCAAAAATTATGCTGAAGTC | TAATTTGGTCCTCGTACAGC | Mapping |
| *GL1* | CH1Z12 (37.157Mb) | CTCAGGTCACGATCCTAGTC | CCAAGGTCATCGATGCCTTG | Mapping |
| *GL1* | CH1Z2 (37.507Mb) | AGGTCAACCATTTTACAGGC | GACATATCCGTTGGTGTATG | Mapping |
| *GL1* | CH1Z3 (37.903Mb) | TGAGAGCAAACGGTTGAGGA | GTACTCCAATGGCTGTTAACT | Mapping |
| *GL1* | CH1Z4 (38.653Mb) | TTCCAACAAGTCCCGGAAGA | AACGCTAAACGAACAGAGTCT | Mapping |
| *GL1* | CH1Z5 (40.170Mb) | GACAGTGCTATGTTAGTATG | TGTGAGGAATTCTATTTACTG | Mapping |
| *GL1* | 930-U3 | AGCCCATGAAGCGTGAAAGGGTTTTAGAGCTAGAAATAGCAAGTTA | CCTTTCACGCTTCATGGGCTGCCACGGATCATCTGCACAACTC | U3 CRISPR |
| *GL1* | 930-U6 | GATGCCTGTATCGACGCTCGGTTTTAGAGCTAGAAATAGCAAGTTA | CGAGCGTCGATACAGGCATCAACCTGAGCCTCAGCGCAGC | U6 CRISPR |
| *GL1* | LOC_1g930-EcoRI-F/LOC_1g930-KpnI-R | ATGACCATGATTACGAATTCTGCTGTCCAAAGAGTTCCTCGGAG | CTAGAGGATCCCCGGGTACCGCTCCGCCACCTTGCCGCTGG | Complementary vector |
| *GL1* | 930-inF/930-inBR | AGCTAGGCAAATTCCATGGC | CTTATGAGCTTTGATGCGGG | Amplifying the large fragment deletion |
| *GL1* | 930-inF/930-inAR | AGCTAGGCAAATTCCATGGC | GGTTGTGGAGAAGGAGATGA | Amplifying the large fragment insertion |
| *GL1* | 930-CTse | GTTTGAGAAGAGAATCTCGAAG | GGCTCGAAGATCTTGGCCTG | Sequencing primers for detecting the CT InDel |
| *GS2* | Gs2TCF/GS2TCTR | GCATATGGATCGGATATGGAC | CGTTTCCACAGGCTTTCTAGA | *GS2* functional marker for the CT haplotype |
| *GS2* | Gs2TCF/GS2GAAR | GCATATGGATCGGATATGGAC | CGTTTCCACAGGCTTTCTCTT | *GS2* functional marker for the AA haplotype |
| *GS3* | GS3-CDS | AGCTCGGCCTCTTGAGGTTGAAG | AGCTACCTCTCCTGGATCTGCTG | *GS3* functional marker for *GS3-4*，*GS3-5* and *GS3-6* |
| *GS3* | GS3 CAPS-F/R | TCCCTCAGACATCACCTGAA | AGGACATGCATGCATTGAAA | *GS3* functional marker for *gs3* |
| *GS3* | GS3-Pro InDel-F/R | TCTACAGCTTTCCCATATGTATC | TTGGCTTCCAGAGACCTACTCG | *GS3* functional marker for *GS3-1* |
| *GS3* | GS3 PRO-F/R | GCTCTCTTTCCTCAGACATGG | CCTACGACGTAGCCAGATATG | *GS3* functional marker for *GS3-1* |
| *GS3* | Chr3-11.5 | GATCGAAGAAAAGTACAGAC | TCCCTCCATTTCTGAGTATTC | Mapping |
| *GS3* | Chr3-15.134 (3C1) | ATACACGCACCAAATGAGGC | GGTGGACAGGACGAAGGAAT | Mapping |
| *GS3* | Chr3-15.7 (C3S1) | GACAGCAAAGGGAGATGTGG | GCAGACATTCACGGACCTTC | Mapping |
| *GS3* | Chr3-16.124 (3C8) | TCTCTCCGAGAAACTAGCCT | AGCGATGGCACTGTTTCAAA | Mapping |
| *GS3* | Chr3-16.640 (C3S5) | ACTGATGTGAGGCCCTTCTT | GCTAGCTGGCTAGGTTTAAACA | Mapping |
| *GS3* | Chr3-16.648 | GGGGATGCAGTTTTGGTTCA | GGAGAGAAAAAAGACAGACAGGA | Mapping |
| *GS3* | Chr3-16.651 | ATTACCTCTCCCCGACCATC | TAGTGGCGTCAAGGGGTTAG | Mapping |
| *GS3* | Chr3-16.717 (3C9) | GCATGCTGATCACTTCTTCTGT | TGCGTACGTGTTAGATGCATC | Mapping |
| *GS3* | Chr3-16.731 (3C10) | TGACCACGTCGATCATCAAG | CCACCTGCAGATTTCTTCCA | Mapping |
| *GS3* | Chr3 -16.716 (C3S6) | TGAGTTTTGAGCTTTCCGAGA | CTAGCTAGTGCCACGACAGT | Mapping |
| *GS3* | Chr3-16.734 (C3S7) | AGAGGAGCAGTTTTTGGGGA | CCCAGCTTAAAACCACTCCT | Mapping |
| *GS3* | Chr3-16.737 | TAGAGATGCGCGTAGTCGTT | TGCCTTGATAGGTTGTGCATG | Mapping |
| *GS3* | CH3-16.752 | CCAACGACGAGGAGAGATGA | CTCGCTTCCCCCACATGTAT | Mapping |
| *GS3* | Chr3- 16.965 | ATGTGCCACTGTCAGTCTGA | CTCCATTTCTTGCAACAGCA | Mapping |
| *GS3* | Chr3-17.112 | TCGCGGGAATGGAGAGATC | AACGAAGCCCAGCGTAATTG | Mapping |
| *GS3* | Chr3-17.7 (C3S4) | CATTTGGTCCTATGTGTCAC | TTCAAGTGGAAATGGAGGCG | Mapping |
| *GS3* | CH3-17.780 | TCTACGCTGGATCATGGCAA | ACGTGCTCGTTGACCAGGTA | Mapping |
| *GS3* | Chr3-18.117 (3C7) | GCGAGAGGCTATTCTCCCTT | GCAGCAGTTTGGAGAGGTTT | Mapping |
| *GS3* | Chr3-19.003 (3C6) | AGTCTCGGCTGCTATAACCA | TGCGAGTAGGGCATTCTCAT | Mapping |
| *GS3* | Chr3-19.181 | ACGTCACCGATGTCAACGC | AAGGCACCGCTGCCACTTG | Mapping |
| *GS3* | Chr3-19.512 | GCTAGAGCTTCCCCTATGGA | CCCTCAAAGATCTAAGAGCCG | Mapping |
| *GS3* | Chr3-19.585 (3C5) | GCAAGGCCAGATGAGAGTTG | GGTGGTGCACTTGCTTCAAA | Mapping |
| *GS3* | Chr3-20.519 (3C4) | CGGGCAACGTCAGATTCATA | TTCCGTCCCATTTCCGATGA | Mapping |
| *GS3* | Chr3-21.620 (3C3) | CGGCAAACCAATAGCGATTG | ATGCCTTGGTTGTGAGAGGA | Mapping |
| *GS3* | Chr3-22.247 (3C2) | GATCTACCCTGAGTGCACGT | GATAGCCTCCCTCCTAGCTG | Mapping |
| *GS3* | Chr3-22.383 | GCTCACGAGGGAAGAATGGT | ACCATAGCTATTGCACCCGA | Mapping |
| *GS3* | Chr3-22.6 (C3S2) | GTTGTCCTAGGAGGGATCAC | CCACCCACTAACCTGCTACA | Mapping |
| *GS3* | Chr3-23.017 | TTCTCTCGCCGTCGTTACAA | GAGCCAAGTTGGTTCTTCGG | Mapping |
| *GS3* | Chr3-23.033 | CGCACGTAAATCTTATGGGCT | GCTGCAGAGCAAAGGAATAAC | Mapping |
| *GW5* | CH5-5.361 | ACTACTGCTACAGTACAGCT | TCGATCTAGCTAGCTAGCCA | Mapping |
| *GW5* | CH5-5.379 | GTCGCATTCTCTCATCTCAG | TTCTGACATGAACAGTTGAA | Mapping |
| *GW5* | GW5-KRF/KRR | GATAACCATCGGTAATTGCT | ACGTACGAACGTATTCTGTG | *GW5* functional marker: K-395bp, Z and N-none |
| *GW5* | GW5-KRF/IN1212RR | GATAACCATCGGTAATTGCT | TAGCACCACGTCTACTCCTAG | *GW5* functional marker: K- ~1.8kb, N- ~640bp, Z-none |
| *GW5* | GW5-F/R | TGTTGGAGTTGGATGGTTCG | TGATGATGATAGGTGGTACT | *GW5* functional marker: K- ~1.1kb, Z-161bp, N-none |
| *GW5.1* | InD6 | AGCTATGTTCGCGAGTGTAT | TGCATCGCAGAACCTTTAGA | Mapping |
| *GW5.1* | InD10 | AGTTGTTGCCATACTGCCTT | TTTGCTGGCAAATCAGTTTGA | Mapping |
| *GW5.1* | InD15 | ATTAACTCCAGCAGGGCATT | CTCTTAACTCGCTGACCTGT | Mapping |
| *GW5.1* | InD11 | CAATAGTACTCACTCCTTCGG | ACCCTCTATTAATACGGGAGA | Mapping |
| *GW5.1* | InD12 | CCACCACCATCTATCTGCATCC | CGTACAGTCAGTGAGCAAGACAGG | Mapping |
| *GW5.1* | InD9 | CGTCGTGAGAGAGATGCGTA | CAAGCAGTAATGAACAGGCGA | Mapping |
| *GW5.1* | InD13 | GATTGAAATAGAACTAAACTAAGCC | TTCCTTATGCTTCAATTCCTT | Mapping |
| *GW5.1* | InD3 | GCGTCGGATGAGCGAGAG | ATCGATCGTTGTCATGCGTG | Mapping |
| *GW5.1* | InD1 | GGAAAAGAGTCCTAATGGCCG | TGCTACATGGTAACGACGGT | Mapping |
| *GW5.1* | InD7 | GGAACAAAGTGTCATGGCC | ATGTGCCATCCAAACGTTA | Mapping |
| *GW5.1* | InD2 | TAACGCCAGGTTATCCACGT | CCCGTCGGAATTGGGATCT | Mapping |
| *GW5.1* | InD5 | TAGACTTTGTGACACAAGCA | ACCCGGTTACACTTACTGT | Mapping |
| *GW5.1* | InD4 | TGCTACCAGATTGTAGGAGCT | AGACGAGTGGTTAAACGTTGC | Mapping |
| *GW5.1* | InD14 | TTGGCAGTTAGTCCTTAACC | GAAGACGTAGAATCTCGAGG | Mapping |
| *GW5.1* | InD8 | TTTTGTACGACAGTGGACGA | GGCGTTGTTGCTTCCTTC | Mapping |
| *GW5.1* | GW5.1-EcoRI -F/GW5.1- KpnI -R | ATGACCATGATTACGAATTCGGGACGAATTTCGGATTAAGCGAC | CTAGAGGATCCCCGGGTACCTCGGGCCTGCGGATCCATCATAT | Complementary vector |
| *GW5.1* | GW5.1-CR -seq | CATTACGCAATCGTTCCCACC | AGTAGCCATAGGCCACTGGATAG | Sequencing for mutated sites |
| *GW5.1* | GW5.1-RT | CATTGACGCCACCCATGTTAGC | TCATGTCTGGTGTTGTCTTCGACG | RT-PCR |
| *GW5.1* | GW5.1-CR | GGGTAGACAGTGCGACCCATGTTTTAGAGCTAGAAATAGCAAGTTA | ATGGGTCGCACTGTCTACCCAACCTGAGCCTCAGCGCAGC | CRISPR |
| *GW5.1* | LF/RR | TTGTCGGAACTTCACCTTCCATG | ACCTCTAGGTTCCGAAGAACATCAC | Verifying the 11.8-kb insertion |
| *GW5.1* | LF/LB | TTGTCGGAACTTCACCTTCCATG | CTGTGGAGTGGAGTTGCCATAGC | Verifying the 11.8-kb insertion |
| *GL7/GW7* | 7R4(23400759) | GGCAGCTAACTTCTGTTCACC | TGGCCTGATTAACGGGTTCT | Mapping |
| *GL7/GW7* | 7K2(24517799) | AAGAGCTTCTTGACGAGGTAGGC | GGAATGGATGGATATGAACAGTGC | Mapping |
| *GL7/GW7* | 7K3(24590165) | CAGCTATGTGTAGCTTCG | CTGCTCATTGGGCGGTTT | Mapping |
| *GL7/GW7* | 7K19(24673034) | CACCCTCACCTTTCTTCGTA | GGTGTAATCAAGAAGGACTTTTGA | Mapping |
| *GL7/GW7* | 7K37(24704644) | CCGTCCATTCTCATGCCCTA | CCAAATGGCAACTATTGAGTG | Mapping |
| *GL7/GW7* | 7K6(24762676) | CCAAATTGCTTCCTCGGATATAGG | CGGATTTAGGGAGTTCGTGTTCG | Mapping |
| *GL7/GW7* | 7K9(25473814) | ACAGTATCCAAGGCCCTGG | CACGTGAGACAAAGACGGAG | Mapping |
| *GL7/GW7* | 7K40(25765048) | CTATCCGCTAGCACCCGATC | AGCACGACGTCTGGAAGTAA | Mapping |
| *GL7/GW7* | 7K48(26277437) | TGCCAAGTCAAAGGTTAGAGG | TTGCATTGCTGATCCATGCA | Mapping |
| *GL7/GW7* | 7K53(26615586) | GCTGTGATCACTGTGCTAGC | CGCTGTCGTAGTAGCCGA | Mapping |
| *GL7/GW7* | 7R5(27067502) | ACACTGGTGCTAAGCTCTGG | GCGCCTAAGAATCTTTATGTGC | Mapping |
| *GL7* | NGSP11F/210QCF | TGACACGCCACAGTCCAAGACGAGCAGT | AAGGGAGTTGAGAGTAGAAAAAA | *GL7* functional marker, PAV of a tandem repeat |
| *GW7* | GW7-F/GW7-2R | ATGGCATTCGCACGCCATTG | GAAAGCCAAGGAGCAAGCAG | *GW7* functional marker |
| *GW7* | seq-gw7 | GACATGATCTTGGGTGTGTG | GAGGAACCTAATCGAAACCA | Sequencing for *GW7* |
| *GW7* | 7K16(24645622) | AGGACTTGACTGAATTGGCA | CAACGTTACGTACTGCACTG | Mapping |
| *GW7* | 7K61(24701962) | TCTGACATTGCACTACAGCTT | GGGCTCTCTCCAGGATTTCA | Mapping |
| *GW8* | CH8-22.058 | GGCAAGTCTGGGCACAACA | CACCATTCCCCCAACGAGA | Mapping |
| *GW8* | CH8-25.436 | CAGATACCATGCACAACTGC | GGAAAACAGATTTCTTAGGAC | Mapping |
| *GW8* | CH8-26.425 | GGCCTTTGTGGACTACTAGT | GATGAAGTAGATTTCGTCGTG | Mapping |
| *GW8* | CH8-26.436 | GGGGGAACGTGTGTCACTGA | CCAGAAGCTGGAATGGATGG | Mapping |
| *GW8* | CH8-26.524 | AGCGCCAAATTTTTCACGAA | GATCCATAGCACTATCATCT | Mapping |
| *GW8* | CH8-26.550 | TAAGAGCGGCTACTATGTGC | CAGTCACTGACATGTCACTG | Mapping |
| *GW8* | CH8-26.551 | GCAAAACAGCAAAAGTACATTG | TGAATATTGATACCCTTAAGTCA | Mapping |
| *GW8* | CH8-27.751 | TAGCTTGTTGATTGAGCTGC | TTAAGTCCAAGCGAGACAGC | Mapping |
| *GW8* | GW8-CT | TGTTCTCCGATGGTGGGTTG | TCGATGGCCGTGGAGTTCG | *GW8* functional marker |
| *GW8* | GW8.1 F/R | AAGCGACACCAGTGTGTG | TCTCCAGCTCGTCGGCTA | *GW8* functional marker (10bp InDel) |

**Supplementary Table 3 Genotypes of the eight grain-size genes in wild rice of 446 accessions (See another PDF file named Supplementary Table 3 due to its very big Table)**

**Supplementary Table 4 Genotypes of the eight grain-size genes and grain size phenotypes in the landrace and cultivar rice of 2462 and 784 accessions, respectively (See another PDF file named Supplementary Table 4 due to its very big Table)**

**Supplementary figures**

**
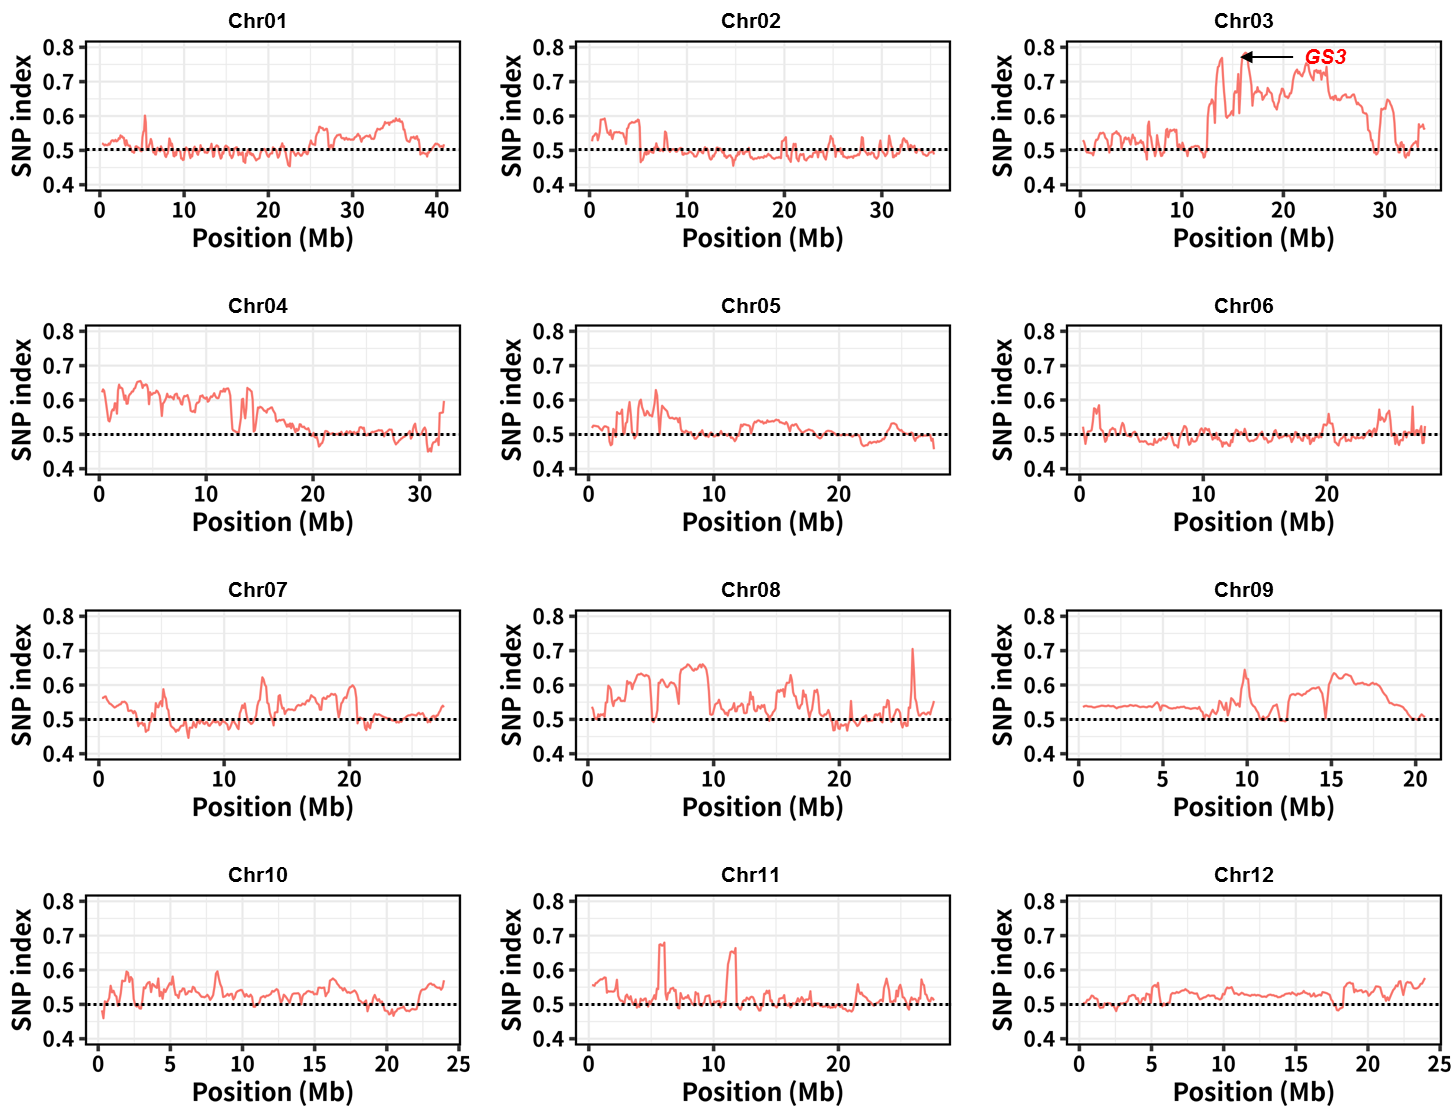
**

**Supplementary Figure 1 QTL mapping of *GS3* by genome sequencing of two DNA pools.** The signal of SNP index was calculated by a 500-kb sliding window and a 100-kb step. The black arrow indicates the signal of *GS3* locus. The dotted lines indicate the SNP index of 0.5.

**
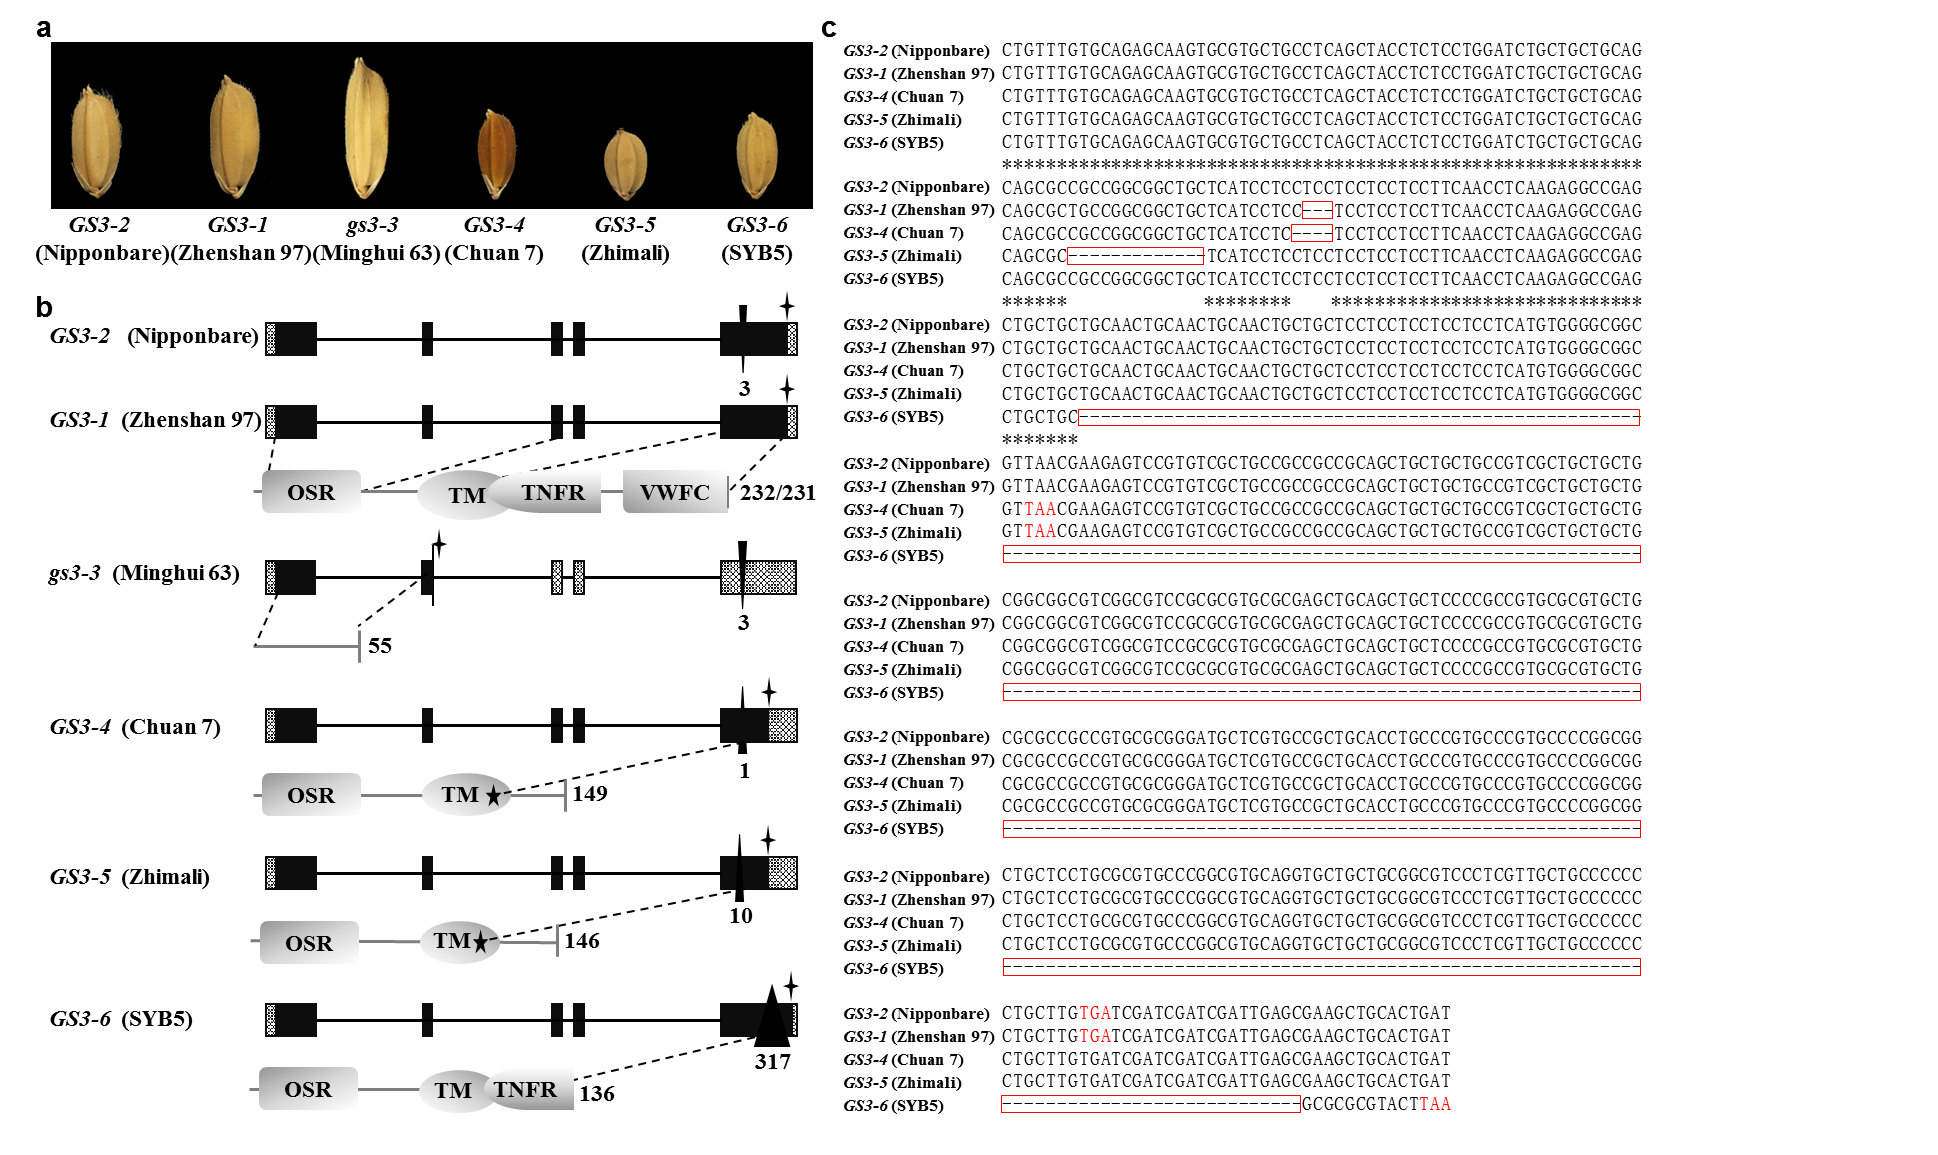
**

**Supplementary Figure 2 Two new alleles of *GS3* (*GS3-5* and *GS3-6*) discovered by RapMap.** (**a**) The grain length phenotypes of the parents for the grain-length gradient populations with different alleles of the *GS3* gene. (**b**) Comparison of the gene and protein sequences of six different alleles of *GS3*. Gene structure: hatched boxes represent 5’UTR and 3’UTR, and five exons are represented by black boxes. The thin lines among black boxes represent introns. Black triangles represent a 3-bp insertion (Nipponbare), a 1-bp deletion (Chuan 7), a 10-bp deletion (Zhimali) and a 317-bp deletion (SYB5), compared with that from Zhenshan 97. Stop codon is marked by a four-pointed star. Protein structure (underneath each gene fragment): the domains encoded by Nipponbare or Zhenshan 97 allele are shown. The numbers indicate the amino acids encoding the protein. The stars indicate the location of protein sequences corresponding to different allelic mutations. (**c**) The sequence alignment of the fifth exon of different alleles of the functional *GS3*. The red boxes indicate the sites of deletion, and the red characters indicate the stop codon.


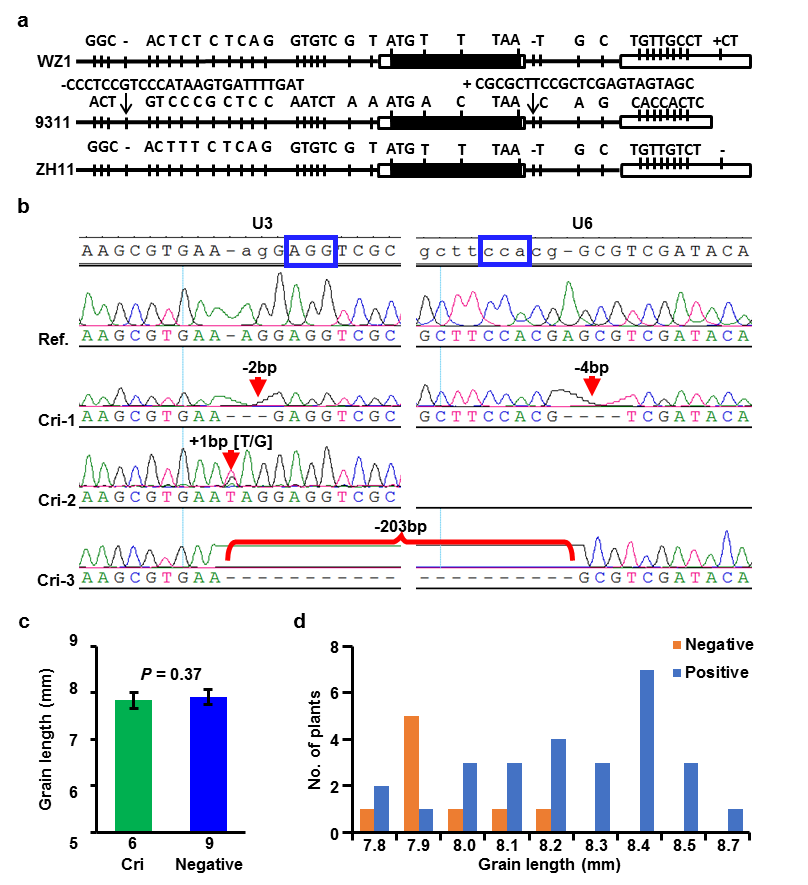


**Supplementary Figure 3** **Natural variations and function validation of *GL1* by CRISPR and complementation transformation.** (**a**) Gene structure and natural variations of *GL1*. Black boxes represent exons, and white boxes represent the untranslated regions. The first thin lines represent promoters and the second represent introns. (**b**) The genotype of Ref. (ZH11), Cri-1, Cri-2 and Cri-3 at U3 or/and U6 target positions for *GL1*. Blue boxes are PAM sites of their targets. (**c**) Grain length of homozygous positive and negative CRISPR lines at the U3 or/and the U6 target positions of *GL1* in ZH11. The statistic significance was under student’s *t*-test. The numbers under the bars showed the count of samples. (**d**) Frequency distribution of independent complementation transformation lines for *GL1* in ZH11.


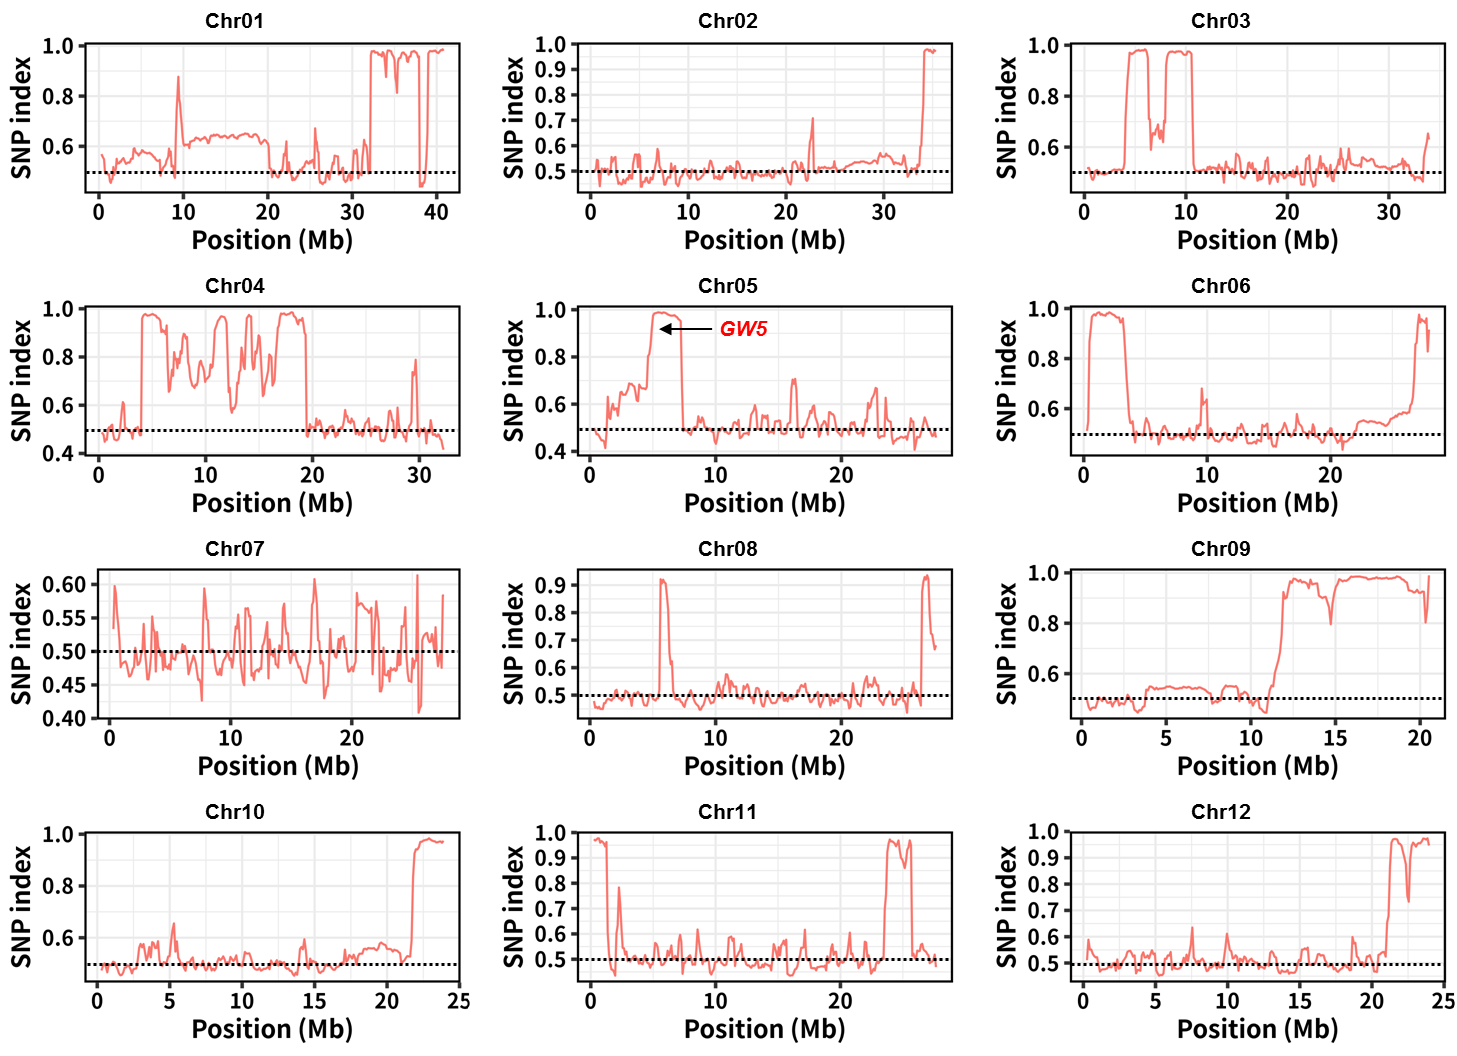


**Supplementary Figure 4 QTL mapping of *GW5* by genome sequencing of two DNA pools.** The signal of SNP index was calculated by a 500-kb sliding window and a 100-kb step. The black arrow indicates the signal of *GS3* locus. The dotted lines indicate the SNP index of 0.5.


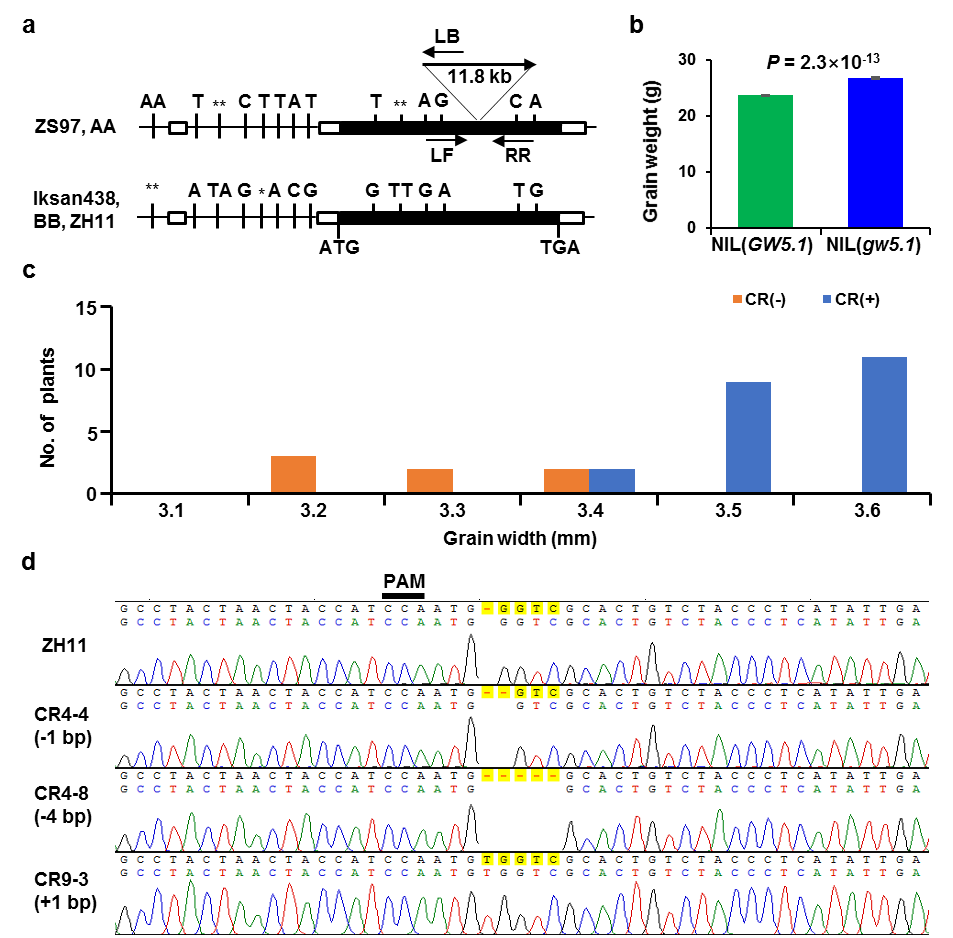


**Supplementary Figure 5 Natural variations and function validation of *GW5.1* by the CRISPR transformation.** (**a**) Comparative sequencing of ORF1 between two alleles. (**b**) Comparison of the 1000-grain weight of NIL(*GW5.1*) and NIL(*gw5.1*). Data represent mean ± s.e.m. (n=15). Student’s *t*-tests were used to generate *P* values. (**c**) Distribution of grain width in the independent individuals of edited CR(+) and unedited CR(-) transformants for *GW5.1*. (**d**) Sequencing analyses of homozygous edited transformants for *GW5.1*.


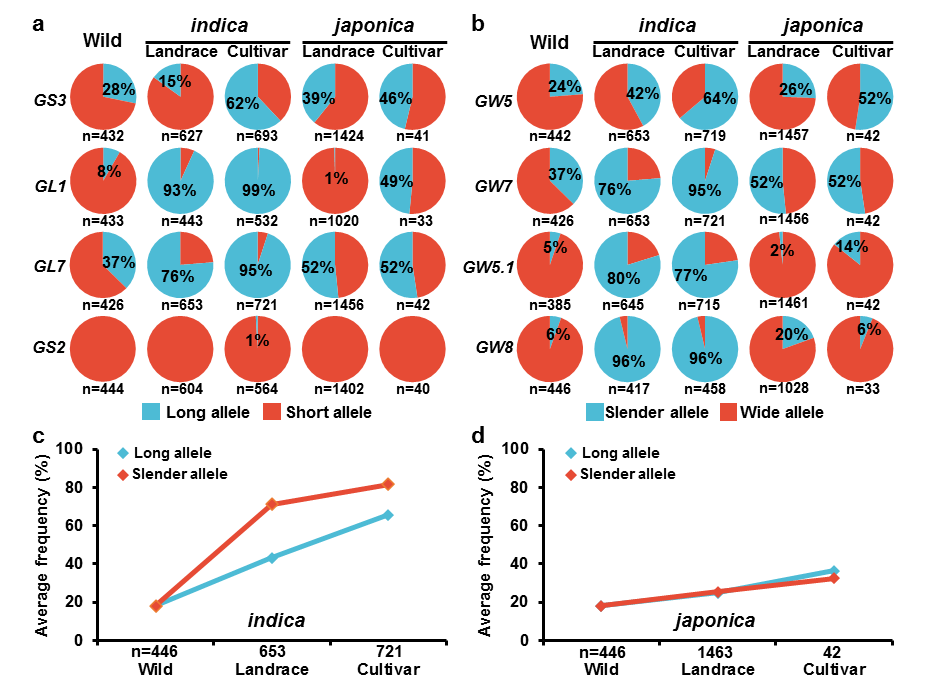


**Supplementary Figure 6 Differential proportions and directional selection with different extent of alleles of grain-length and grain-width genes in *indica* and *japonica* subspecies during the improvement process.** (**a, b**) Proportions of grain-length (a) and grain-width (b) alleles in *indica* and *japonica* subspecies. (**c, d**) The average allele frequency of long-grain and slender-grain alleles from wild to landrace and from landrace to cultivar in *indica* (c) and *japonica* (d) subspecies.


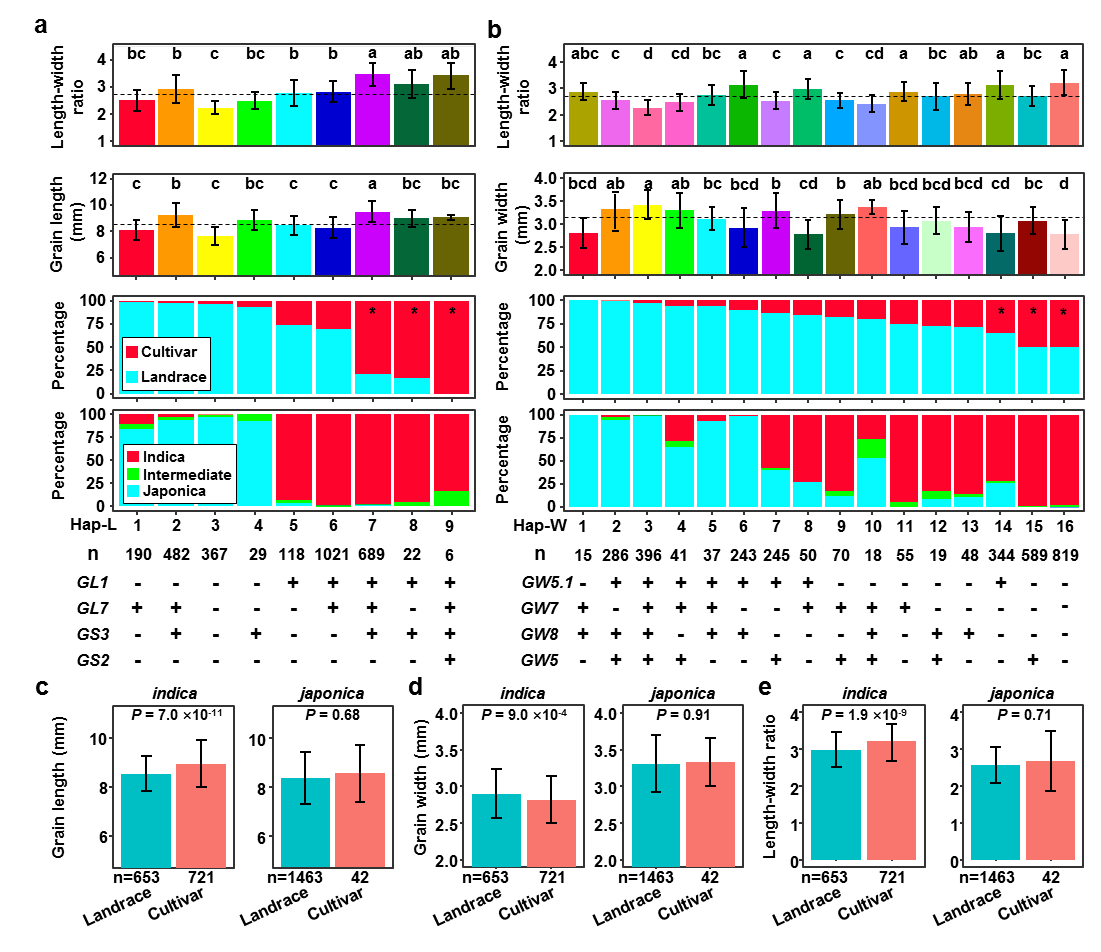


**Supplementary Figure 7 Phenotype effects of different haplotypes of four grain-length genes (a) and four grain-width genes (b), and comparisons of grain length (c), grain width (d) and length-width ratio (e) in landrace and cultivar grouped by *indica* and *japonica* subspecies.** Letters on the error bars in a and b represents the significance of Fisher’s least significant difference after analysis of variance. The dotted lines showed the average grain length (a) and the grain width (b) of landrace rice. Asterisks marked the three haplotypes with most proportion of cultivars. Hap-L and Hap-W represent haplotypes for grain length (a) and grain width (b), respectively. “+” and “-” represent the positive and negative effects of each gene on grain length (a) or grain width (b), respectively. Error bars indicated the standard deviation. n is the number of accessions. Student’s *t*-tests were used to generate *P* values in c–e.


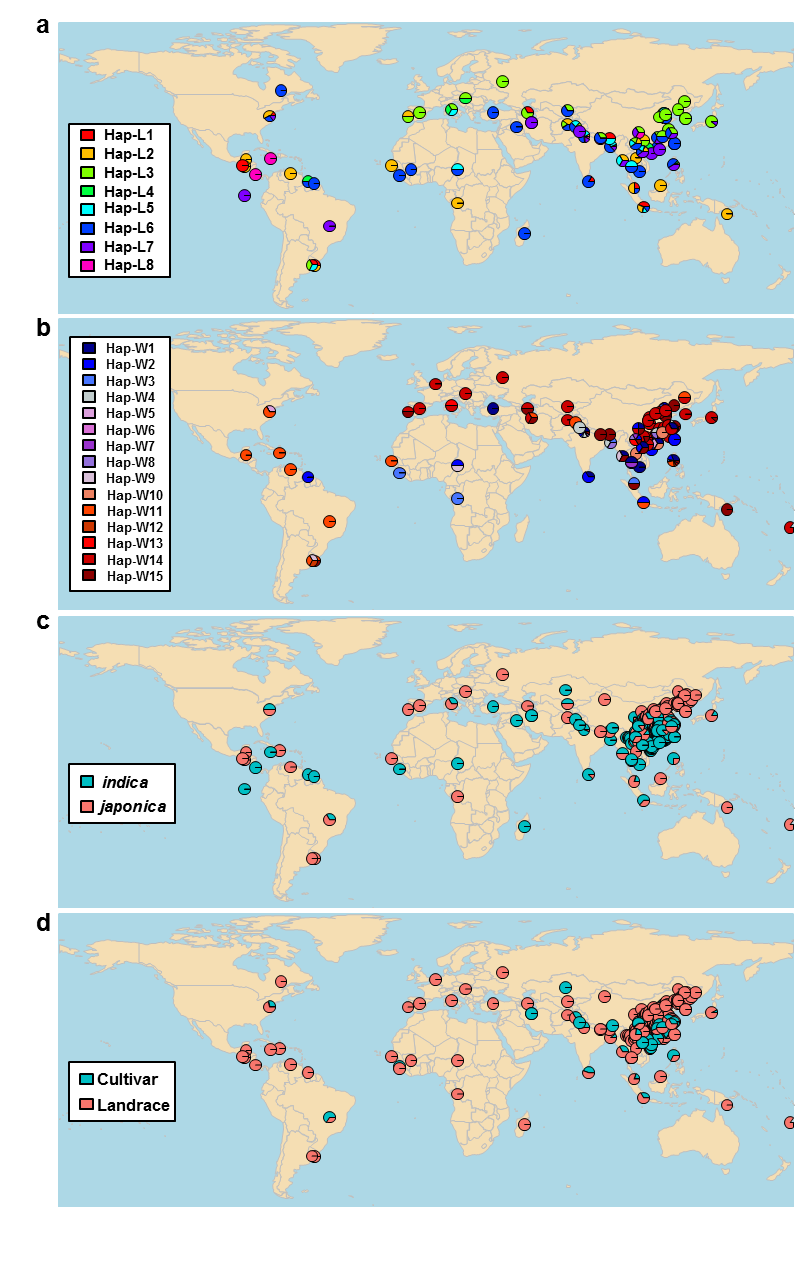


**Supplementary Figure 8 Geographical distribution of the accessions worldwide used for the selection and evolution analyses of the eight grain-size genes.** (**a–b**) Distributions of the grain-length and grain-width haplotypes in Supplementary Figure 7. Hap-L and Hap-W represent grain-length and grain-width haplotypes in Supplementary Figure 7, respectively. (**c**) Distribution of the *indica* and *japonica* subspecies. (**d**) Distribution of the landraces and cultivars. Data were drawn on the map by rworldmap package.


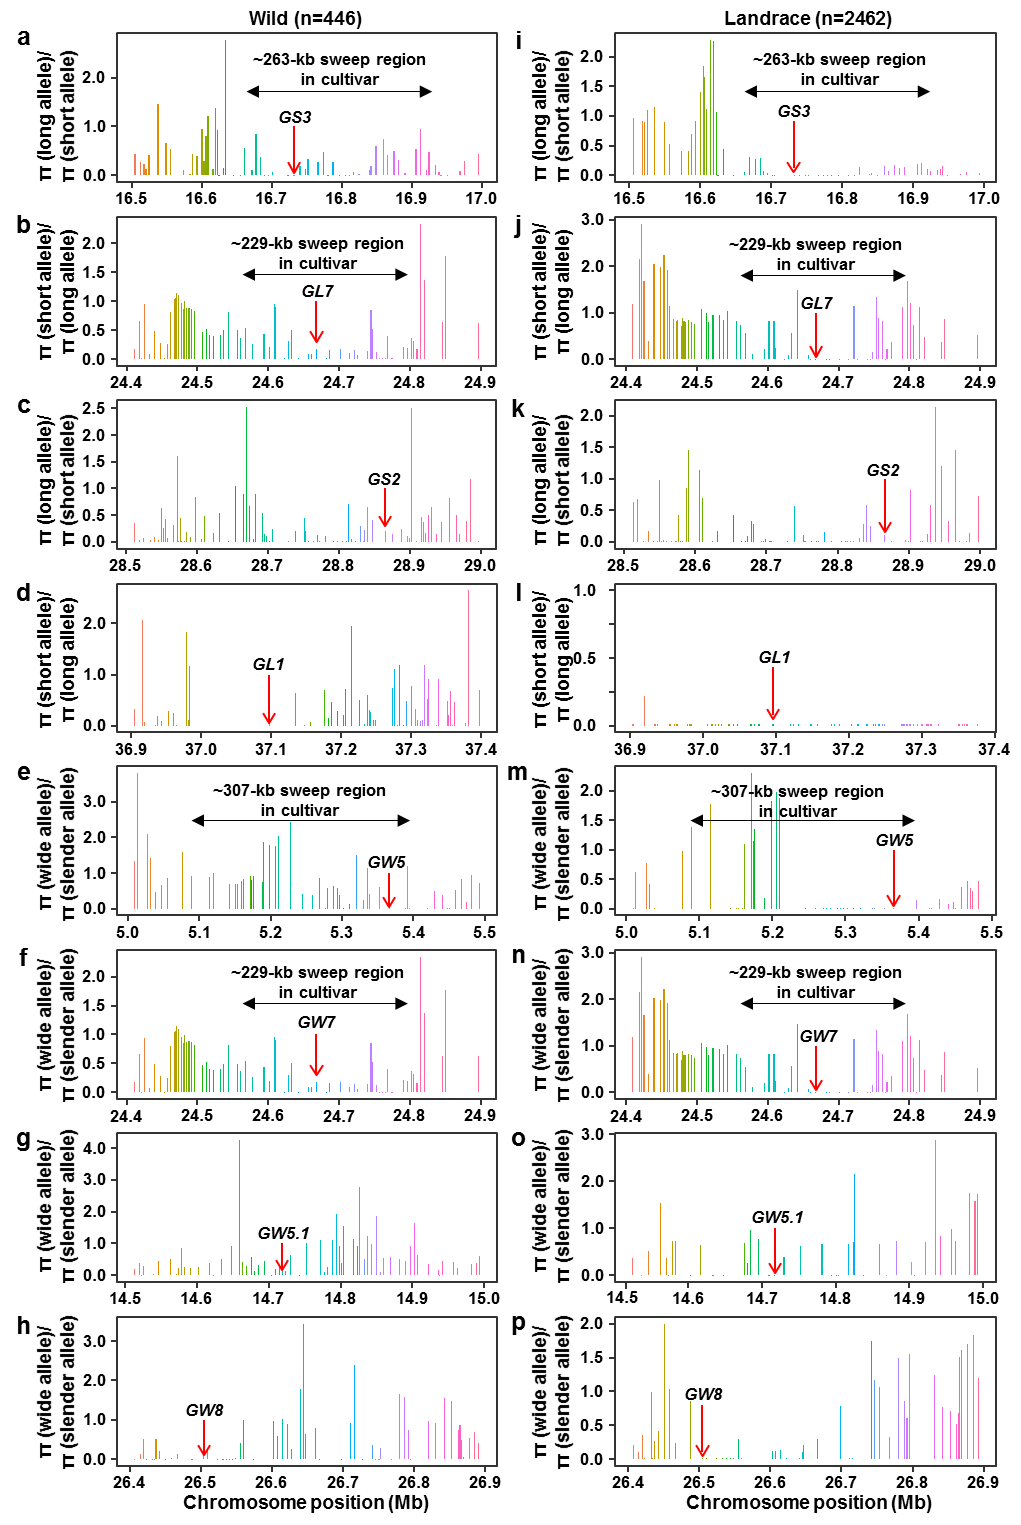


**Supplementary Figure 9 Selection sweeps of the eight grain-size gene loci in wild and landrace rice.** (**a–h**) Selection sweep scanning across *O. sativa* genome regions of the eight grain-size gene loci in wild rice of 446 accessions. (**i–p**) Selection sweep scanning across *O. sativa* genome regions of the eight grain-size gene loci in landrace rice of 2462 accessions. Bars indicate the ratios of silent-site nucleotide diversities of each gene in these loci between long/short allele accessions or wide/slender allele accessions. The smallest bars are equivalent to a ratio of 0. Red arrows are indicative of each grain-size gene. To compare the differences, the sweep regions in cultivars identified in Fig. 5a–h are displayed on each locus.
